# Supplementary material for: Structures and energies of Cu clusters on Fe and Fe3C surfaces from density functional theory computation
Source: Royal Society of Chemistry journal article supplement (doi:10.1039/c4cp04012k), 2014-01-01

## Supporting Information

### Structures and Energies of Cu<sub>n</sub> Clusters on Fe and Fe<sub>3</sub>C Surfaces from Density Functional Theory Computation

Xinxin Tian,<sup>a,b,c</sup> Tao Wang,<sup>d</sup> Yong Yang,<sup>a,b</sup> Yong-Wang Li,<sup>a,b</sup> Jianguo Wang,<sup>a</sup> Haijun Jiao<sup>\*,a,d</sup>

*a) State Key Laboratory of Coal Conversion, Institute of Coal Chemistry, Chinese Academy of Sciences, Taiyuan, 030001, China; b) National Energy Center for Coal to Liquids, Synfuels CHINA Co., Ltd, Huairou District, Beijing, 101400, China; c) University of Chinese Academy of Sciences, Beijing, 100049, China; d) Leibniz-Institut für Katalyse eV. an der Universität Rostock, Albert-Einstein-Strasse 29a, 18059 Rostock, Germany.*

E-mail address: [haijun.jiao@catalysis.de](mailto:haijun.jiao@catalysis.de)

#### Table of content

|                                                                                                                                                     |          |
|-----------------------------------------------------------------------------------------------------------------------------------------------------|----------|
| Table S1-2. Benchmark Calculations                                                                                                                  | Page S2  |
| Table S3-4. Adsorption energies and detailed structure properties of Cu <sub>1-6</sub> on Fe <sub>3</sub> C(100) and Fe <sub>3</sub> C(010) surface | Page S4  |
| Table S5. Adsorption energies of Cu <sub>n</sub> on Fe(110) and Fe <sub>3</sub> C(001) surfaces with respect to Cu atom and bulk fcc-Cu energy      | Page S6  |
| Fig. S1-4. Various optimized Cu <sub>1-7</sub> configurations on the <i>p</i> (4×4) Fe(100) surface                                                 | Page S7  |
| Fig. S5-8. Various optimized Cu <sub>2-7</sub> configurations on the <i>p</i> (3×3) Fe(111) surface                                                 | Page S11 |
| Fig. S9-16. Various optimized Cu <sub>1-7, 13</sub> configurations on the <i>p</i> (2×2) Fe <sub>3</sub> C(010) surface                             | Page S17 |
| Fig. S17-24. Various optimized Cu <sub>1-7, 13</sub> configurations on the <i>p</i> (2×2) Fe <sub>3</sub> C(100) surface                            | Page S25 |
| Fig. S25. Surface size effect test of Cu <sub>4</sub> and Cu <sub>5</sub> on the <i>p</i> (5×4) Fe(100) surface (adsorption energy in eV)           | Page S33 |
| Fig. S26. Surface size effect test Cu <sub>5</sub> on the <i>p</i> (2×3) Fe <sub>3</sub> C(010) surface (adsorption energy in eV)                   | Page S34 |

**Table S1:** Benchmark of slab thickness and relaxation thickness of single Cu atom adsorption on Fe(100) and Fe(111) surfaces. (L represents total layers, R represents relaxed layers.)

| Test                 | Fe(100)     |                       | Fe(111)     |                       |
|----------------------|-------------|-----------------------|-------------|-----------------------|
| Slab thickness       |             | $E_{\text{ads}}$ (eV) |             | $E_{\text{ads}}$ (eV) |
|                      | p(3×3)-3LR2 | -3.20                 | p(3×3)-6LR4 | -3.77                 |
|                      | p(3×3)-4LR2 | -3.15                 | p(3×3)-7LR4 | -3.81                 |
|                      | p(3×3)-5LR2 | -3.11                 | p(3×3)-8LR4 | -3.78                 |
|                      | p(3×3)-6LR2 | -3.17                 | p(3×3)-9LR4 | -3.84                 |
|                      | p(3×3)-7LR2 | -3.16                 |             |                       |
| Relaxation thickness | p(3×3)-5LR2 | -3.11                 | p(3×3)-6LR3 | -3.74                 |
|                      | p(3×3)-5LR3 | -3.13                 | p(3×3)-6LR4 | -3.77                 |
|                      | p(3×3)-5LR4 | -3.13                 | p(3×3)-6LR5 | -3.78                 |

**Table S2:** Benchmark of slab thickness and relaxation thickness of single Cu atom adsorption on Fe<sub>3</sub>C(100) and Fe<sub>3</sub>C(010) surfaces. (L represents total layers, R represents relaxed layers.)

| Test                 | Fe <sub>3</sub> C(100) |                       | Fe <sub>3</sub> C(010) |                       |
|----------------------|------------------------|-----------------------|------------------------|-----------------------|
|                      |                        | E <sub>ads</sub> (eV) |                        | E <sub>ads</sub> (eV) |
| Slab thickness       | p(2×2)-10LR6           | -3.16                 | p(1×1)-6LR3            | -3.16                 |
|                      | p(2×2)-12LR6           | -3.22                 | p(1×1)-7LR3            | -3.17                 |
|                      | p(2×2)-13LR6           | -3.19                 | p(1×1)-8LR3            | -3.19                 |
|                      | p(2×2)-15LR6           | -3.19                 | p(1×1)-9LR3            | -3.17                 |
| Relaxation thickness | p(1×1)-12LR6           | -3.16                 | p(1×1)-6LR3            | -3.16                 |
|                      | p(1×1)-12LR7           | -3.17                 | p(1×1)-6LR4            | -3.16                 |
|                      | p(1×1)-12LR8           | -3.18                 | p(1×1)-6LR5            | -3.18                 |

**Table S3.** Adsorption energies [ $E(\text{Cu}_{n/\text{ads}})$ ; eV], coordination numbers (CN) with surface Fe(C) atoms, numbers of Cu–Cu bond (NB) for  $\text{Cu}_n$  ( $n = 1\text{--}6$ ) on the  $\text{Fe}_3\text{C}(100)$  surface

|                          | $E(\text{Cu}_{n/\text{ads}})$ | CN-Fe | CN-C | NB |                         | $E(\text{Cu}_{n/\text{ads}})$ | CN-Fe | CN-C | NB |
|--------------------------|-------------------------------|-------|------|----|-------------------------|-------------------------------|-------|------|----|
| $\text{Cu}_1\text{-6F}$  | -3.58                         | 5     | 1    | 0  | $\text{Cu}_4\text{-3}$  | -14.08                        | 17    | 3    | 3  |
| $\text{Cu}_1\text{-4F1}$ | -3.22                         | 3     | 1    | 0  | $\text{Cu}_4\text{-4}$  | -14.06                        | 16    | 4    | 5  |
| $\text{Cu}_1\text{-4F2}$ | -3.16                         | 3     | 1    | 0  | $\text{Cu}_4\text{-5}$  | -13.99                        | 15    | 3    | 4  |
| $\text{Cu}_1\text{-4F3}$ | -3.09                         | 3     | 1    | 0  | $\text{Cu}_4\text{-6}$  | -13.81                        | 13    | 3    | 5  |
| $\text{Cu}_1\text{-4F4}$ | -3.08                         | 4     | 0    | 0  | $\text{Cu}_4\text{-7}$  | -13.26                        | 13    | 2    | 2  |
| $\text{Cu}_1\text{-2F}$  | -2.54                         | 2     | 0    | 0  | $\text{Cu}_4\text{-8}$  | -13.18                        | 12    | 3    | 3  |
| $\text{Cu}_1\text{-1F}$  | -1.74                         | 1     | 0    | 0  | $\text{Cu}_4\text{-9}$  | -12.94                        | 10    | 2    | 6  |
| $\text{Cu}_2\text{-1}$   | -7.17                         | 10    | 2    | 0  | $\text{Cu}_4\text{-10}$ | -12.69                        | 11    | 3    | 6  |
| $\text{Cu}_2\text{-2}$   | -7.13                         | 10    | 2    | 0  | $\text{Cu}_4\text{-11}$ | -12.61                        | 10    | 2    | 3  |
| $\text{Cu}_2\text{-3}$   | -7.06                         | 10    | 2    | 0  | $\text{Cu}_5\text{-1}$  | -17.28                        | 24    | 4    | 0  |
| $\text{Cu}_2\text{-4}$   | -6.76                         | 8     | 2    | 0  | $\text{Cu}_5\text{-2}$  | -17.71                        | 18    | 4    | 7  |
| $\text{Cu}_2\text{-5}$   | -6.71                         | 9     | 1    | 0  | $\text{Cu}_5\text{-3}$  | -17.62                        | 21    | 5    | 4  |
| $\text{Cu}_2\text{-6}$   | -6.71                         | 8     | 2    | 0  | $\text{Cu}_5\text{-4}$  | -17.61                        | 20    | 4    | 5  |
| $\text{Cu}_2\text{-7}$   | -6.66                         | 8     | 2    | 0  | $\text{Cu}_5\text{-5}$  | -17.59                        | 23    | 4    | 2  |
| $\text{Cu}_2\text{-8}$   | -6.65                         | 9     | 1    | 0  | $\text{Cu}_5\text{-6}$  | -17.53                        | 19    | 5    | 7  |
| $\text{Cu}_2\text{-9}$   | -6.39                         | 6     | 2    | 0  | $\text{Cu}_5\text{-7}$  | -17.40                        | 18    | 4    | 6  |
| $\text{Cu}_2\text{-10}$  | -6.38                         | 7     | 1    | 0  | $\text{Cu}_5\text{-8}$  | -16.98                        | 16    | 3    | 7  |
| $\text{Cu}_2\text{-11}$  | -6.35                         | 6     | 2    | 0  | $\text{Cu}_5\text{-9}$  | -16.86                        | 16    | 4    | 8  |
| $\text{Cu}_2\text{-12}$  | -6.98                         | 8     | 2    | 1  | $\text{Cu}_5\text{-10}$ | -16.64                        | 16    | 4    | 8  |
| $\text{Cu}_2\text{-13}$  | -6.92                         | 8     | 2    | 1  | $\text{Cu}_5\text{-11}$ | -16.47                        | 13    | 3    | 8  |
| $\text{Cu}_2\text{-14}$  | -6.60                         | 7     | 1    | 1  | $\text{Cu}_5\text{-12}$ | -16.30                        | 15    | 4    | 4  |
| $\text{Cu}_2\text{-15}$  | -6.33                         | 6     | 2    | 1  | $\text{Cu}_6\text{-1}$  | -20.40                        | 28    | 4    | 0  |
| $\text{Cu}_3\text{-1}$   | -10.63                        | 15    | 3    | 0  | $\text{Cu}_6\text{-2}$  | -21.20                        | 20    | 4    | 10 |
| $\text{Cu}_3\text{-2}$   | -10.29                        | 14    | 2    | 0  | $\text{Cu}_6\text{-3}$  | -21.12                        | 23    | 5    | 7  |
| $\text{Cu}_3\text{-3}$   | -10.28                        | 13    | 3    | 0  | $\text{Cu}_6\text{-4}$  | -21.12                        | 22    | 4    | 8  |
| $\text{Cu}_3\text{-4}$   | -10.24                        | 14    | 2    | 0  | $\text{Cu}_6\text{-5}$  | -21.09                        | 21    | 5    | 10 |
| $\text{Cu}_3\text{-5}$   | -10.00                        | 12    | 2    | 0  | $\text{Cu}_6\text{-6}$  | -21.06                        | 24    | 5    | 5  |
| $\text{Cu}_3\text{-6}$   | -10.71                        | 13    | 3    | 2  | $\text{Cu}_6\text{-7}$  | -21.05                        | 26    | 6    | 4  |
| $\text{Cu}_3\text{-7}$   | -10.34                        | 12    | 2    | 2  | $\text{Cu}_6\text{-8}$  | -21.05                        | 21    | 5    | 10 |
| $\text{Cu}_3\text{-8}$   | -10.31                        | 11    | 3    | 3  | $\text{Cu}_6\text{-9}$  | -21.05                        | 26    | 6    | 4  |
| $\text{Cu}_3\text{-9}$   | -10.29                        | 12    | 2    | 2  | $\text{Cu}_6\text{-10}$ | -20.96                        | 26    | 6    | 4  |
| $\text{Cu}_3\text{-10}$  | -10.29                        | 10    | 2    | 3  | $\text{Cu}_6\text{-11}$ | -20.96                        | 26    | 4    | 5  |
| $\text{Cu}_3\text{-11}$  | -10.26                        | 11    | 3    | 2  | $\text{Cu}_6\text{-12}$ | -20.67                        | 23    | 4    | 4  |
| $\text{Cu}_3\text{-12}$  | -10.08                        | 11    | 3    | 3  | $\text{Cu}_6\text{-13}$ | -20.52                        | 20    | 4    | 8  |
| $\text{Cu}_3\text{-13}$  | -10.01                        | 9     | 2    | 2  | $\text{Cu}_6\text{-14}$ | -20.33                        | 18    | 4    | 10 |
| $\text{Cu}_3\text{-14}$  | -9.74                         | 10    | 2    | 2  | $\text{Cu}_6\text{-15}$ | -20.32                        | 19    | 5    | 9  |
| $\text{Cu}_4\text{-1}$   | -14.11                        | 20    | 4    | 0  | $\text{Cu}_6\text{-16}$ | -20.06                        | 18    | 4    | 6  |
| $\text{Cu}_4\text{-2}$   | -14.21                        | 16    | 4    | 4  |                         |                               |       |      |    |

**Table S4.** Adsorption energies [ $E(\text{Cu}_{n/\text{ads}})$ ; eV], coordination numbers (CN) with surface Fe(C) atoms, numbers of Cu–Cu bond (NB) for  $\text{Cu}_n$  ( $n = 1\text{--}6$ ) on the  $\text{Fe}_3\text{C}(010)$  surface

|                         | $E(\text{Cu}_{n/\text{ads}})$ | CN-Fe | CN-C | NB |                         | $E(\text{Cu}_{n/\text{ads}})$ | CN-Fe | CN-C | NB |
|-------------------------|-------------------------------|-------|------|----|-------------------------|-------------------------------|-------|------|----|
| $\text{Cu}_1\text{-5F}$ | -3.39                         | 5     | 0    | 0  | $\text{Cu}_4\text{-9}$  | -13.39                        | 12    | 0    | 5  |
| $\text{Cu}_1\text{-4F}$ | -3.18                         | 4     | 0    | 0  | $\text{Cu}_4\text{-10}$ | -13.24                        | 14    | 0    | 5  |
| $\text{Cu}_1\text{-2F}$ | -2.60                         | 2     | 0    | 0  | $\text{Cu}_4\text{-11}$ | -13.20                        | 13    | 0    | 5  |
| $\text{Cu}_1\text{-1F}$ | -2.14                         | 1     | 0    | 0  | $\text{Cu}_4\text{-12}$ | -13.16                        | 14    | 0    | 3  |
| $\text{Cu}_2\text{-1}$  | -6.79                         | 10    | 0    | 0  | $\text{Cu}_5\text{-1}$  | -16.61                        | 22    | 0    | 0  |
| $\text{Cu}_2\text{-2}$  | -6.79                         | 10    | 0    | 0  | $\text{Cu}_5\text{-2}$  | -17.77                        | 25    | 0    | 4  |
| $\text{Cu}_2\text{-3}$  | -6.76                         | 10    | 0    | 0  | $\text{Cu}_5\text{-3}$  | -17.67                        | 22    | 0    | 6  |
| $\text{Cu}_2\text{-4}$  | -6.62                         | 9     | 0    | 0  | $\text{Cu}_5\text{-4}$  | -17.55                        | 22    | 0    | 5  |
| $\text{Cu}_2\text{-5}$  | -6.57                         | 9     | 0    | 0  | $\text{Cu}_5\text{-5}$  | -17.50                        | 22    | 0    | 5  |
| $\text{Cu}_2\text{-6}$  | -6.57                         | 9     | 0    | 0  | $\text{Cu}_5\text{-6}$  | -17.32                        | 25    | 0    | 2  |
| $\text{Cu}_2\text{-7}$  | -6.37                         | 8     | 0    | 0  | $\text{Cu}_5\text{-7}$  | -17.19                        | 19    | 0    | 6  |
| $\text{Cu}_2\text{-8}$  | -6.36                         | 8     | 0    | 0  | $\text{Cu}_5\text{-8}$  | -17.08                        | 19    | 0    | 6  |
| $\text{Cu}_2\text{-9}$  | -6.34                         | 8     | 0    | 0  | $\text{Cu}_5\text{-9}$  | -17.06                        | 19    | 0    | 6  |
| $\text{Cu}_2\text{-10}$ | -6.98                         | 10    | 0    | 1  | $\text{Cu}_5\text{-10}$ | -16.86                        | 18    | 0    | 6  |
| $\text{Cu}_2\text{-11}$ | -6.61                         | 8     | 0    | 1  | $\text{Cu}_5\text{-11}$ | -16.71                        | 16    | 0    | 6  |
| $\text{Cu}_3\text{-1}$  | -10.17                        | 15    | 0    | 0  | $\text{Cu}_5\text{-12}$ | -15.97                        | 14    | 0    | 8  |
| $\text{Cu}_3\text{-2}$  | -10.57                        | 15    | 0    | 2  | $\text{Cu}_6\text{-1}$  | -19.75                        | 22    | 0    | 4  |
| $\text{Cu}_3\text{-3}$  | -10.16                        | 12    | 0    | 3  | $\text{Cu}_6\text{-2}$  | -19.63                        | 24    | 0    | 2  |
| $\text{Cu}_3\text{-4}$  | -10.16                        | 12    | 0    | 2  | $\text{Cu}_6\text{-3}$  | -19.63                        | 24    | 0    | 2  |
| $\text{Cu}_3\text{-5}$  | -10.08                        | 12    | 0    | 2  | $\text{Cu}_6\text{-4}$  | -21.39                        | 27    | 0    | 7  |
| $\text{Cu}_3\text{-6}$  | -10.07                        | 12    | 0    | 2  | $\text{Cu}_6\text{-5}$  | -21.33                        | 30    | 0    | 5  |
| $\text{Cu}_3\text{-7}$  | -10.03                        | 11    | 0    | 3  | $\text{Cu}_6\text{-6}$  | -21.16                        | 27    | 0    | 6  |
| $\text{Cu}_3\text{-8}$  | -9.92                         | 12    | 0    | 2  | $\text{Cu}_6\text{-7}$  | -21.15                        | 24    | 0    | 8  |
| $\text{Cu}_3\text{-9}$  | -9.90                         | 10    | 0    | 3  | $\text{Cu}_6\text{-8}$  | -21.11                        | 27    | 0    | 6  |
| $\text{Cu}_3\text{-10}$ | -9.58                         | 10    | 0    | 2  | $\text{Cu}_6\text{-9}$  | -21.10                        | 30    | 0    | 4  |
| $\text{Cu}_4\text{-1}$  | -13.55                        | 20    | 0    | 0  | $\text{Cu}_6\text{-10}$ | -21.10                        | 30    | 0    | 4  |
| $\text{Cu}_4\text{-2}$  | -14.42                        | 20    | 0    | 4  | $\text{Cu}_6\text{-11}$ | -21.01                        | 24    | 0    | 8  |
| $\text{Cu}_4\text{-3}$  | -13.94                        | 17    | 0    | 4  | $\text{Cu}_6\text{-12}$ | -20.97                        | 24    | 0    | 8  |
| $\text{Cu}_4\text{-4}$  | -13.81                        | 17    | 0    | 4  | $\text{Cu}_6\text{-13}$ | -20.91                        | 24    | 0    | 8  |
| $\text{Cu}_4\text{-5}$  | -13.68                        | 17    | 0    | 3  | $\text{Cu}_6\text{-14}$ | -20.70                        | 23    | 0    | 8  |
| $\text{Cu}_4\text{-6}$  | -13.51                        | 14    | 0    | 4  | $\text{Cu}_6\text{-15}$ | -20.60                        | 21    | 0    | 8  |
| $\text{Cu}_4\text{-7}$  | -13.46                        | 14    | 0    | 5  | $\text{Cu}_6\text{-16}$ | -20.19                        | 21    | 0    | 7  |
| $\text{Cu}_4\text{-8}$  | -13.42                        | 14    | 0    | 4  | $\text{Cu}_6\text{-17}$ | -19.81                        | 19    | 0    | 10 |

**Table S5.** Adsorption energies [ $E(\text{Cu}_{n/\text{ads}})$ ; eV] of  $\text{Cu}_n$  on Fe(110) and  $\text{Fe}_3\text{C}(001)$  surfaces with respect to Cu atom and bulk fcc-Cu energy.

| Fe(110)                    | $E(\text{Cu}_{n/\text{ads}})-\text{Cu}_{\text{atom}}$ | $E(\text{Cu}_{\text{ads/av}})-\text{Cu}_{\text{bulk}}$ | $\text{Fe}_3\text{C}(001)$ | $E(\text{Cu}_{n/\text{ads}})-\text{Cu}_{\text{atom}}$ | $E(\text{Cu}_{\text{ads/av}})-\text{Cu}_{\text{bulk}}$ |
|----------------------------|-------------------------------------------------------|--------------------------------------------------------|----------------------------|-------------------------------------------------------|--------------------------------------------------------|
| $\text{Cu}_1$              | -3.30                                                 | 0.20                                                   | $\text{Cu}_1$              | -3.28                                                 | 0.22                                                   |
| $\text{Cu}_2\text{-a}$     | -6.77                                                 | 0.23                                                   | $\text{Cu}_2\text{-a}$     | -6.56                                                 | 0.44                                                   |
| $\text{Cu}_3\text{-a}$     | -10.26                                                | 0.25                                                   | $\text{Cu}_3\text{-a}$     | -9.82                                                 | 0.69                                                   |
| $\text{Cu}_4\text{-a}$     | -13.99                                                | 0.02                                                   | $\text{Cu}_4\text{-a}$     | -13.10                                                | 0.91                                                   |
| $\text{Cu}_5\text{-a}$     | -17.43                                                | 0.09                                                   | $\text{Cu}_5\text{-a}$     | -16.15                                                | 1.37                                                   |
| $\text{Cu}_6\text{-a}$     | -20.95                                                | 0.07                                                   | $\text{Cu}_6\text{-a}$     | -19.16                                                | 1.86                                                   |
| $\text{Cu}_7\text{-a}$     | -24.55                                                | -0.04                                                  |                            |                                                       |                                                        |
| $\text{Cu}_2\text{-b}$     | -6.76                                                 | 0.24                                                   | $\text{Cu}_2\text{-b}$     | -6.36                                                 | 0.65                                                   |
| $\text{Cu}_3\text{-b}$     | -10.25                                                | 0.26                                                   | $\text{Cu}_3\text{-b}$     | -9.82                                                 | 0.69                                                   |
| $\text{Cu}_4\text{-b}$     | -13.77                                                | 0.24                                                   | $\text{Cu}_4\text{-b}$     | -13.16                                                | 0.85                                                   |
| $\text{Cu}_5\text{-b}$     | -17.28                                                | 0.24                                                   | $\text{Cu}_5\text{-b}$     | -16.46                                                | 1.05                                                   |
| $\text{Cu}_6\text{-b}$     | -20.79                                                | 0.23                                                   | $\text{Cu}_6\text{-b}$     | -20.06                                                | 0.96                                                   |
| $\text{Cu}_7\text{-b}$     | -24.49                                                | 0.03                                                   |                            |                                                       |                                                        |
| $\text{Cu}_4\text{-c}$     | -12.78                                                | 1.23                                                   | $\text{Cu}_4\text{-c}$     | -12.46                                                | 1.56                                                   |
| $\text{Cu}_5\text{-c}$     | -16.53                                                | 0.98                                                   | $\text{Cu}_5\text{-c}$     | -15.91                                                | 1.60                                                   |
| $\text{Cu}_6\text{-c}$     | -20.06                                                | 0.96                                                   | $\text{Cu}_6\text{-c}$     | -19.37                                                | 1.65                                                   |
| $\text{Cu}_7\text{-c}$     | -23.76                                                | 0.76                                                   | $\text{Cu}_7$              | -23.35                                                | 1.17                                                   |
| $\text{Cu}_{13}\text{-a}$  | -46.96                                                | -1.43                                                  | $\text{Cu}_{13}\text{-a}$  | -43.50                                                | 2.04                                                   |
| $\text{Cu}_{13}\text{-c1}$ | -45.84                                                | -0.30                                                  | $\text{Cu}_{13}\text{-b}$  | -42.91                                                | 2.63                                                   |
| $\text{Cu}_{13}\text{-c2}$ | -43.71                                                | 1.83                                                   | $\text{Cu}_{13}\text{-c}$  | -41.59                                                | 3.95                                                   |

Fig. S1. Various optimized  $\text{Cu}_{1-4}$  configurations on the  $p(4\times 4)$  Fe(100) surface (adsorption energy in eV)

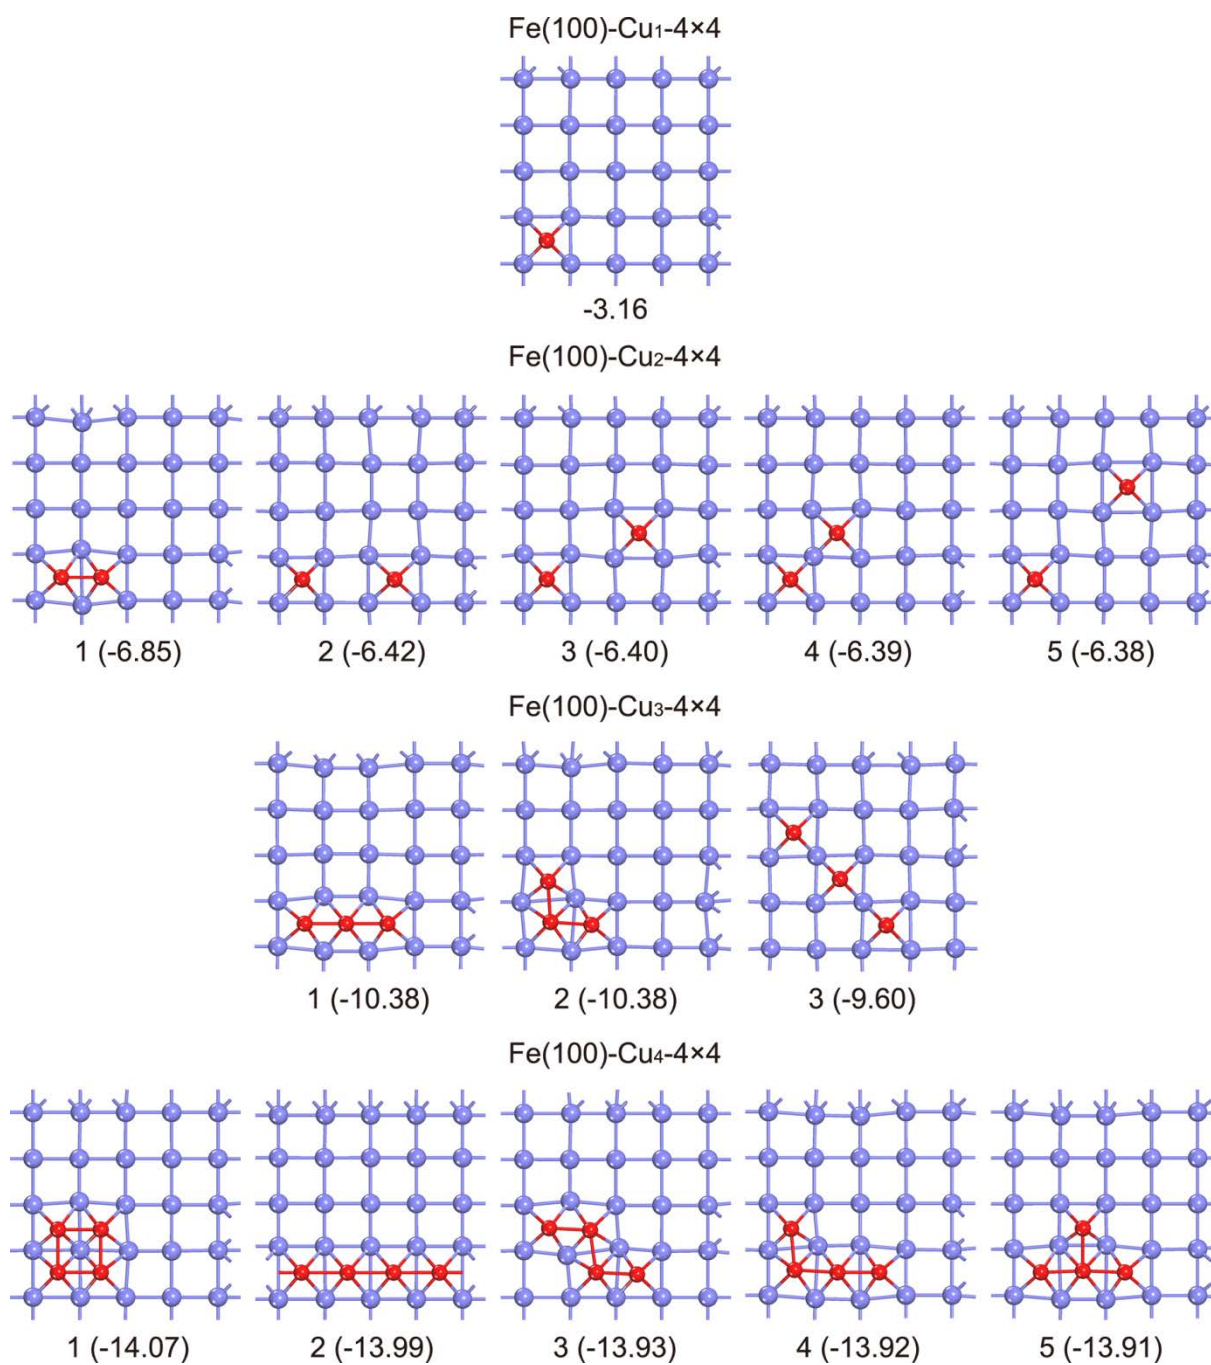

Fig. S2. Various optimized Cu<sub>5</sub> configurations on the p(4×4) Fe(100) surface (adsorption energy in eV)

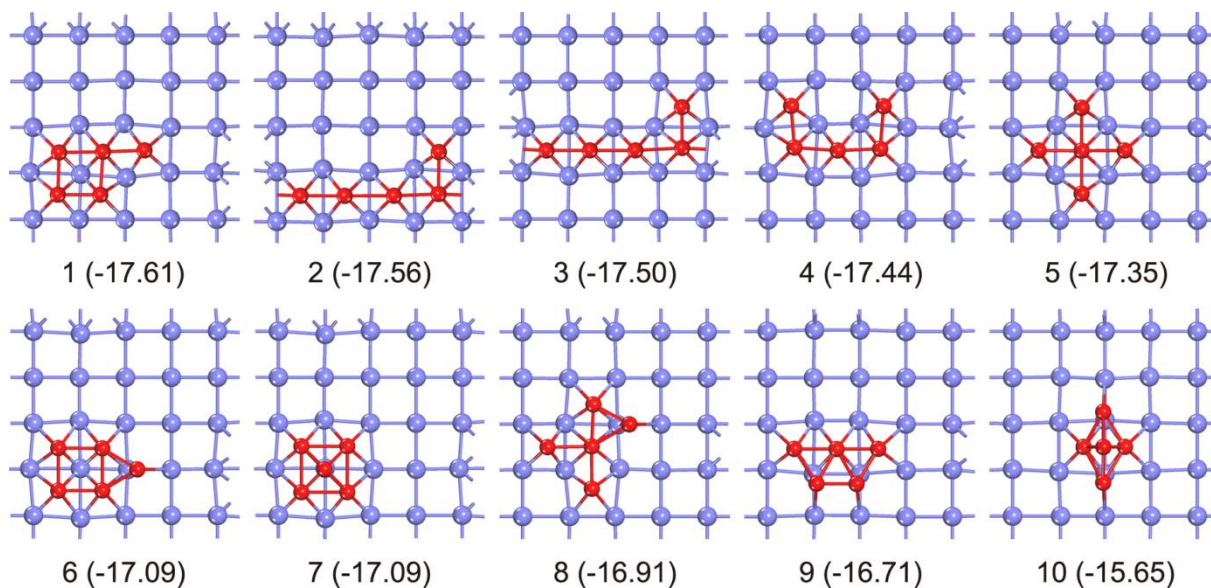



Fig. S3. Various optimized Cu<sub>6</sub> configurations on the p(4×4) Fe(100) surface (adsorption energy in eV)

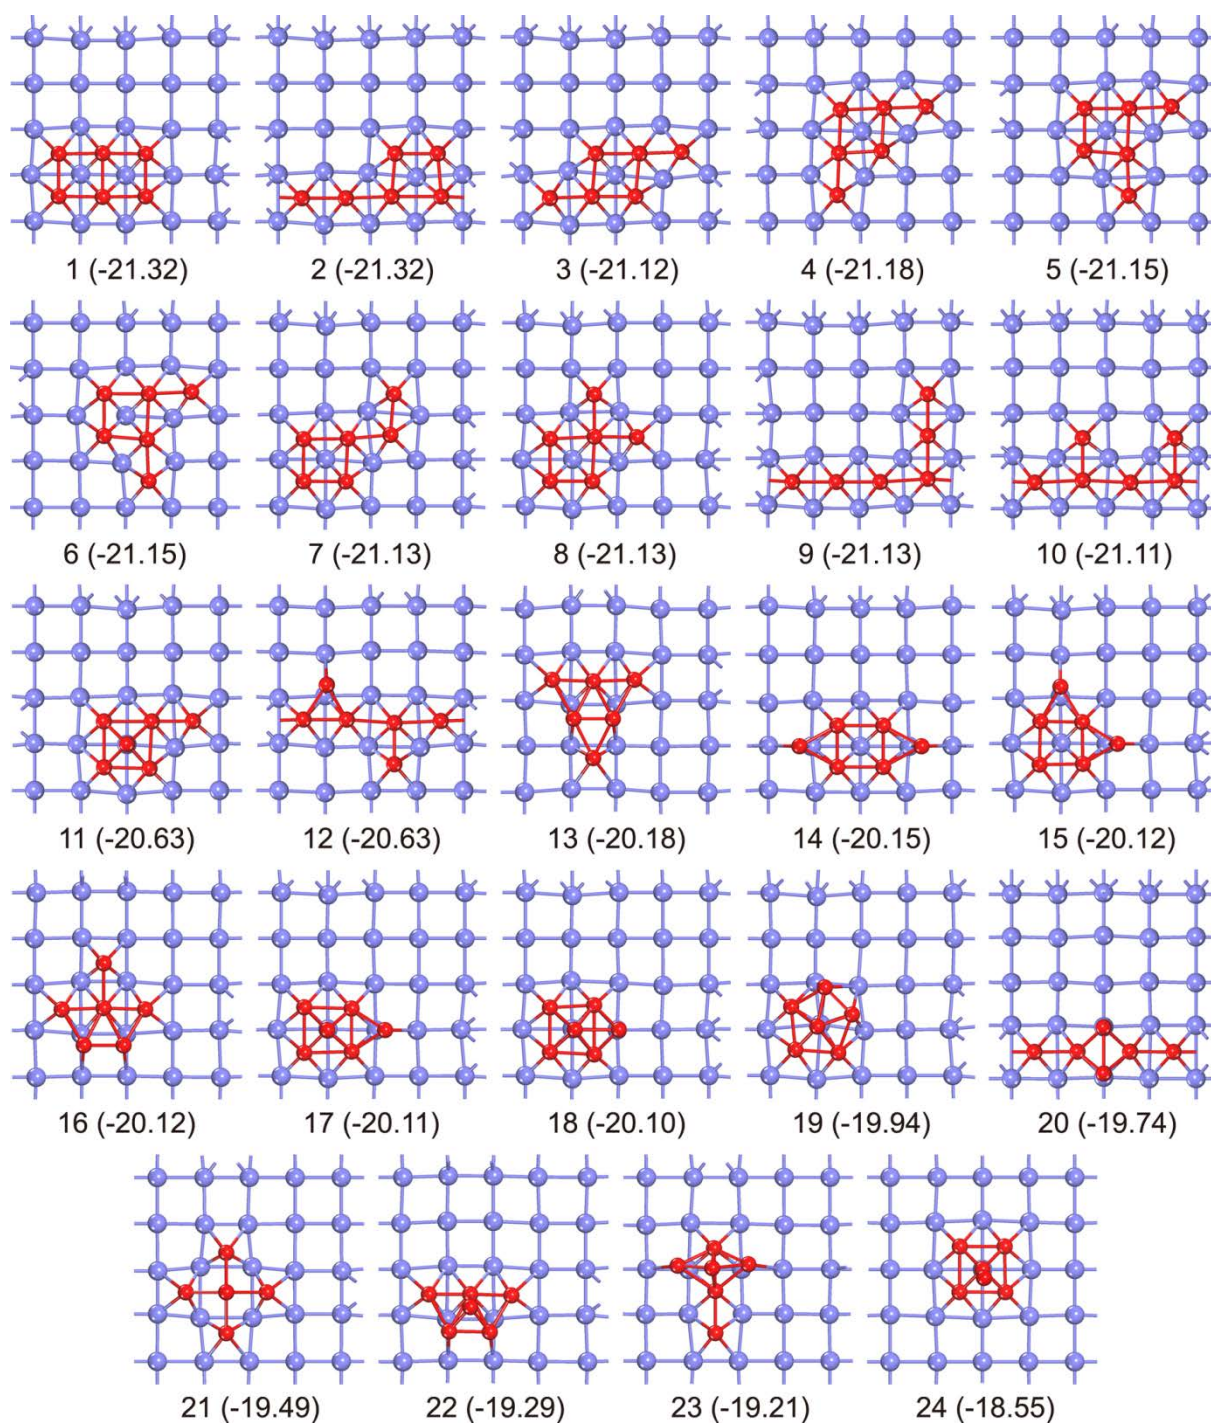

Fig. S4. Various optimized Cu<sub>7</sub> configurations on the p(4×4) Fe(100) surface (adsorption energy in eV)

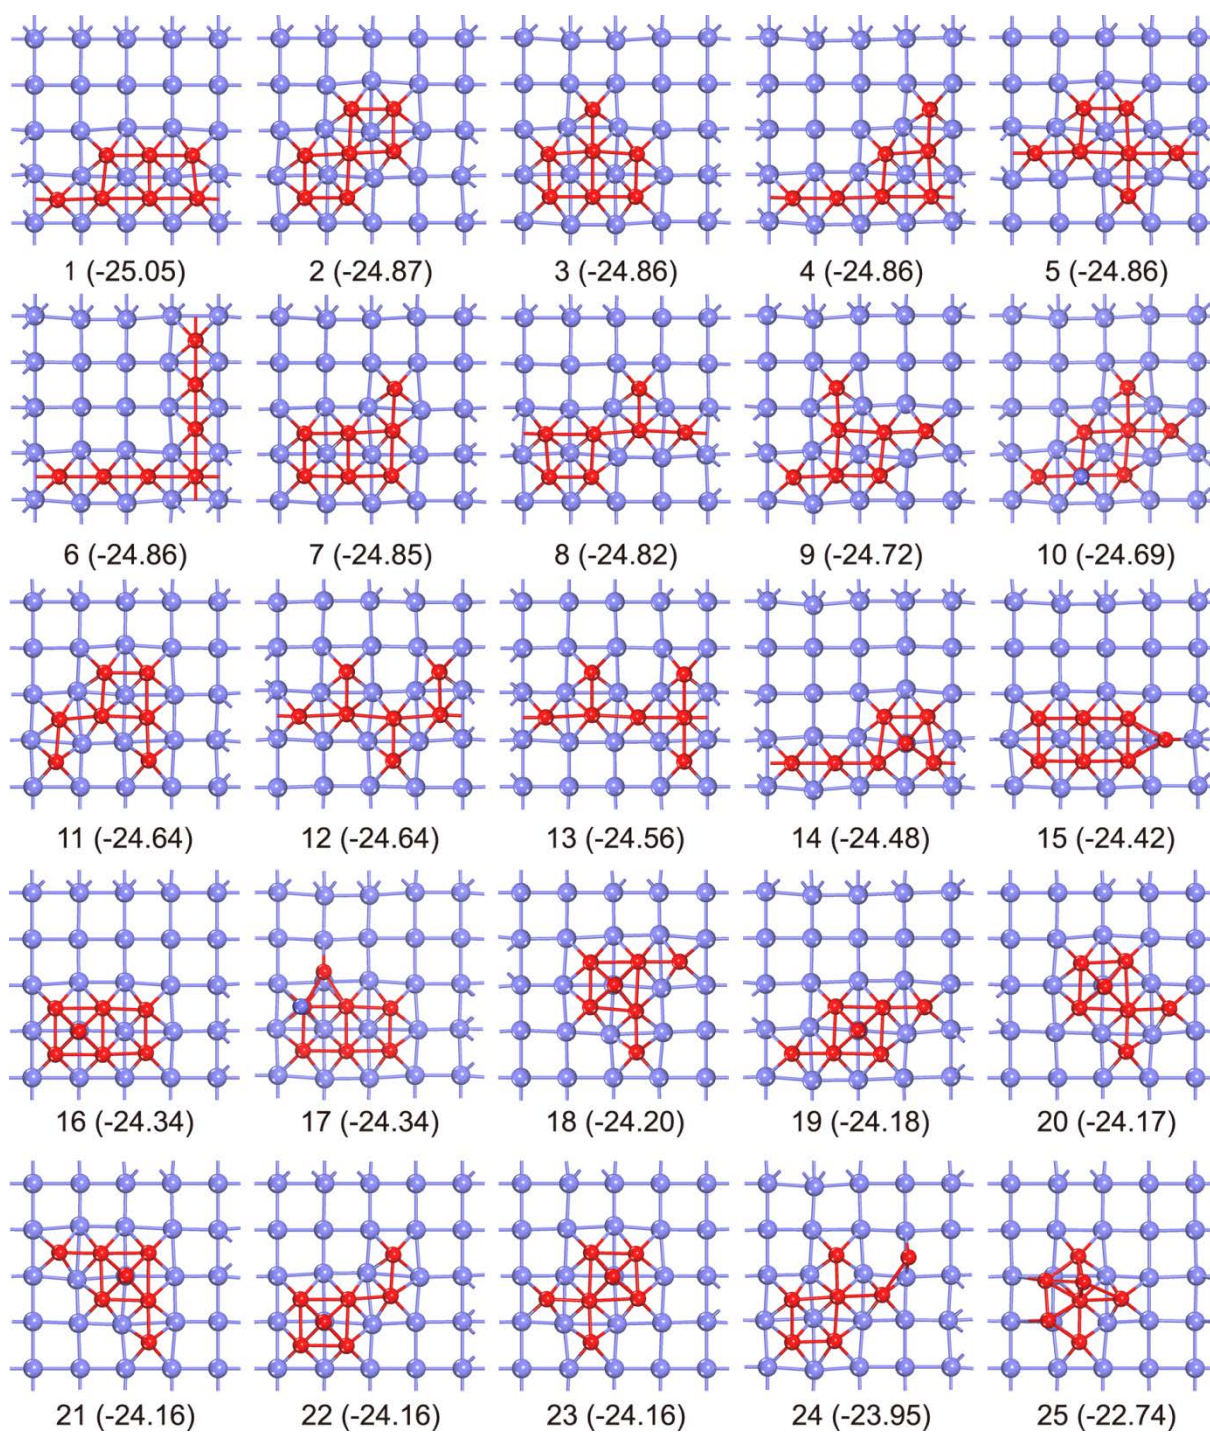



Fig. S5. Various optimized Cu<sub>2-4</sub> configurations on the p(3×3) Fe(111) surface (adsorption energy in eV)

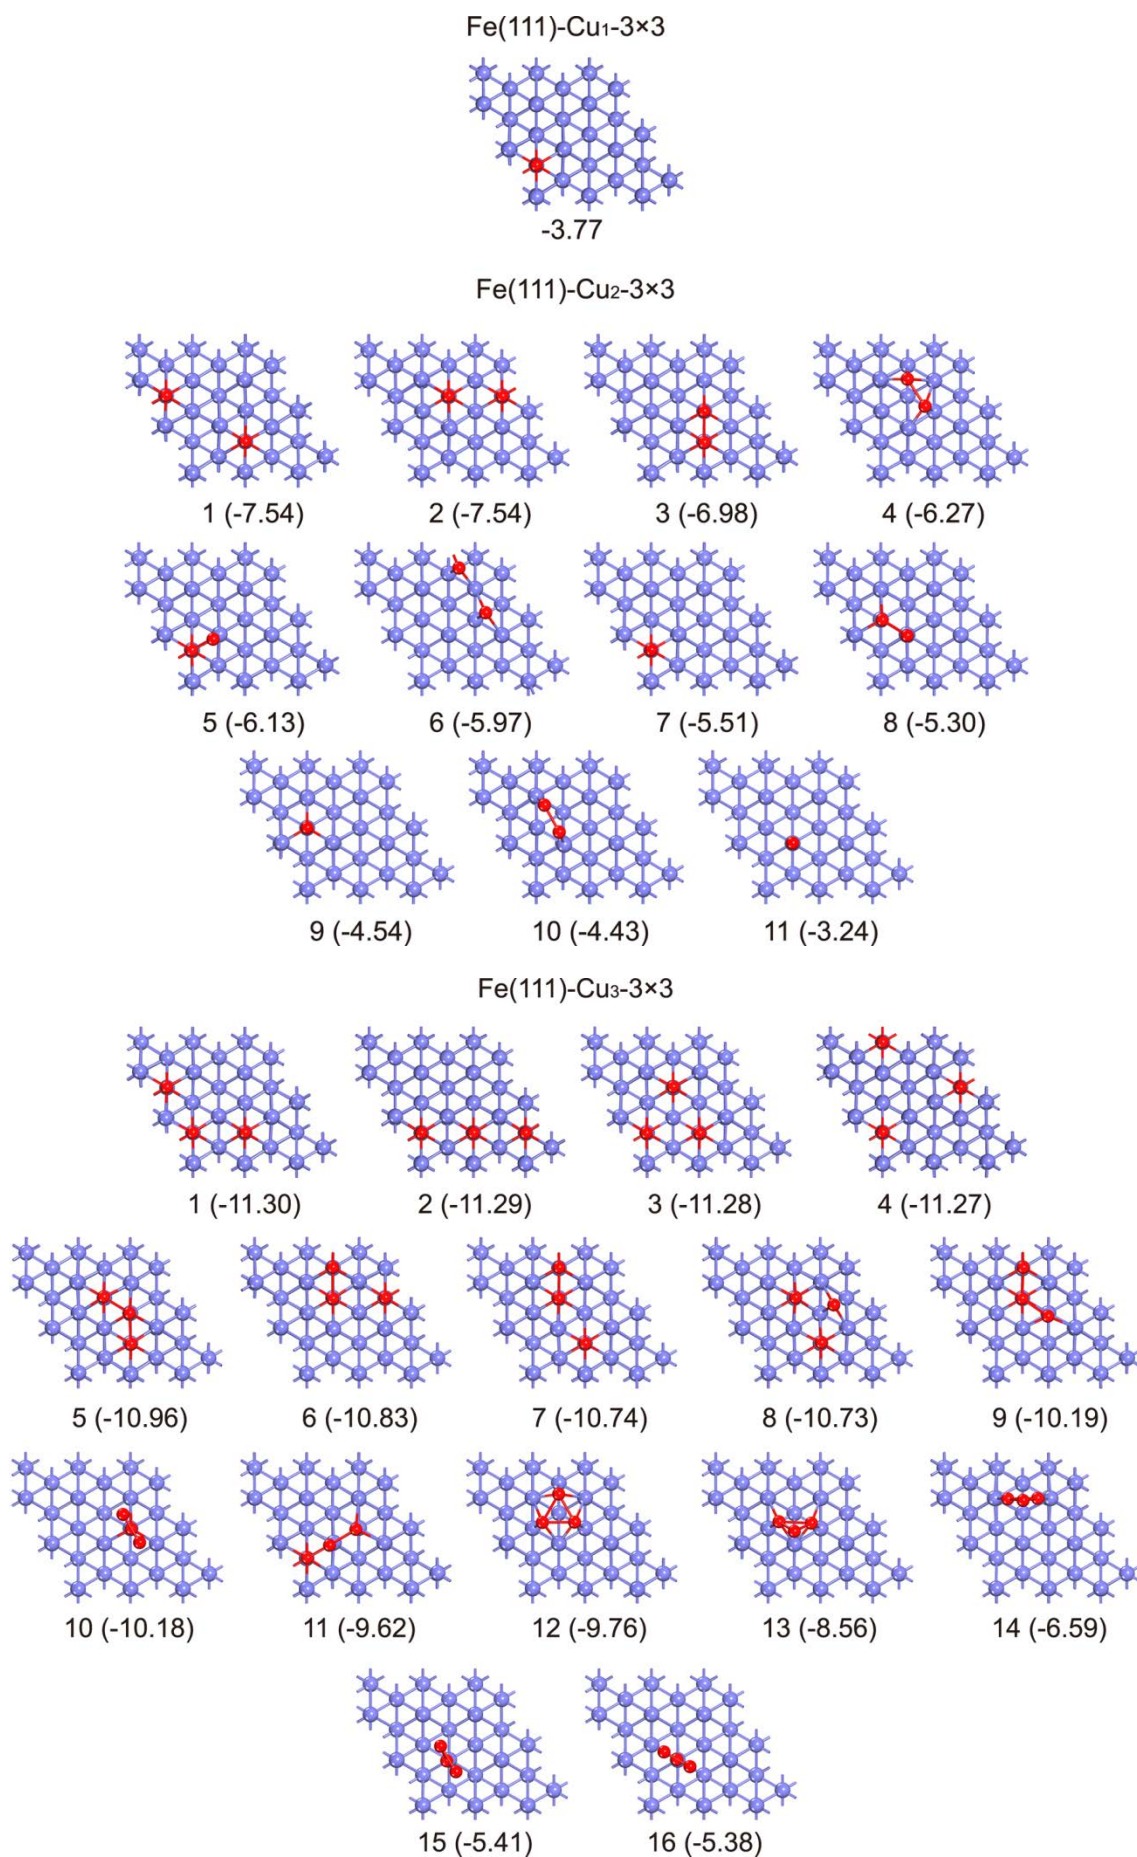

Fe(111)-Cu<sub>4</sub>-3×3

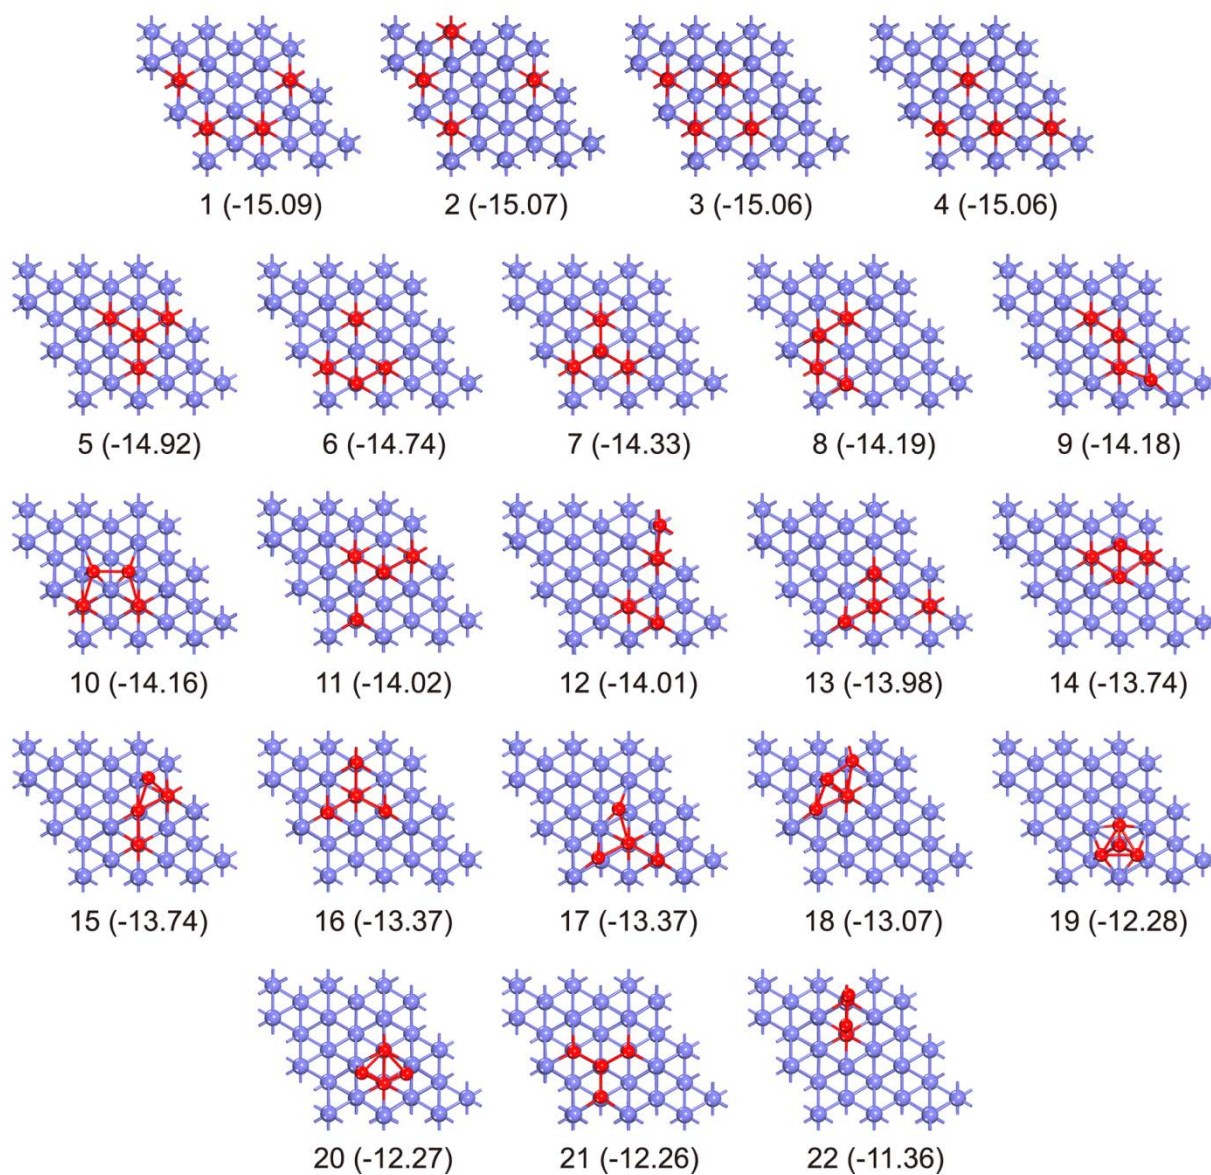



Fig. S6. Various optimized Cu<sub>5</sub> configurations on the p(3×3) Fe(111) surface (adsorption energy in eV)

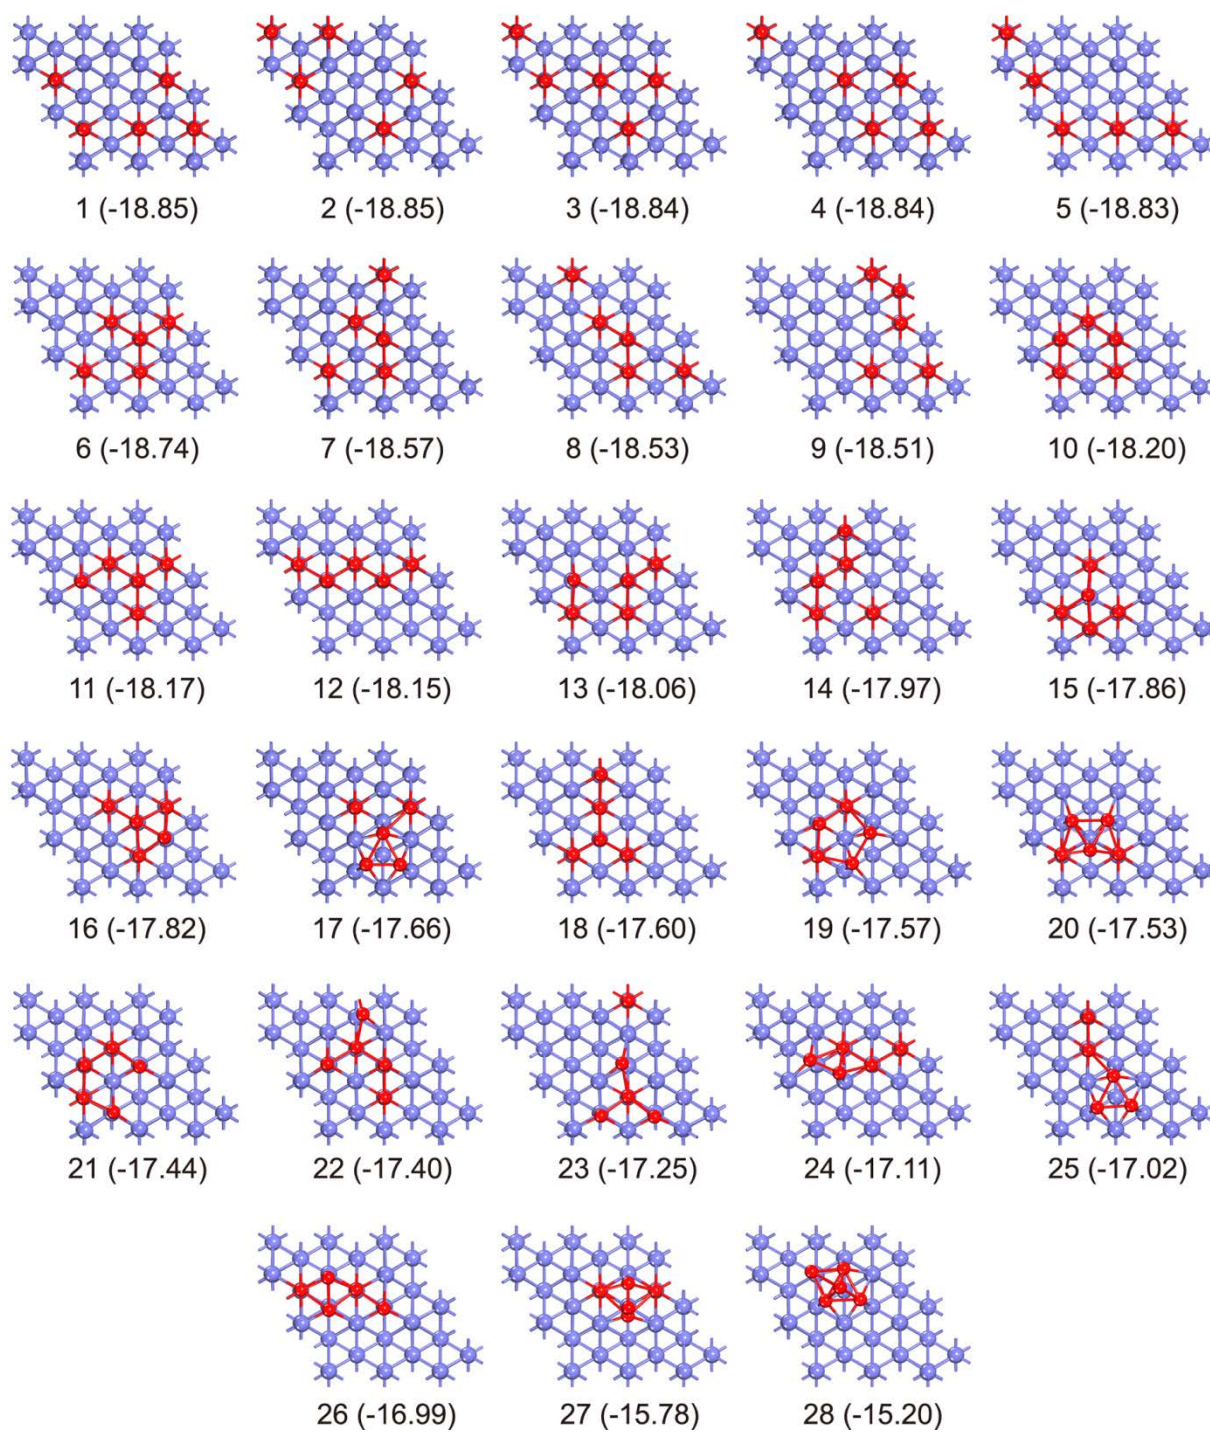

Fig. S7. Various optimized  $\text{Cu}_6$  configurations on the  $p(3\times 3)$  Fe(111) surface (adsorption energy in eV)

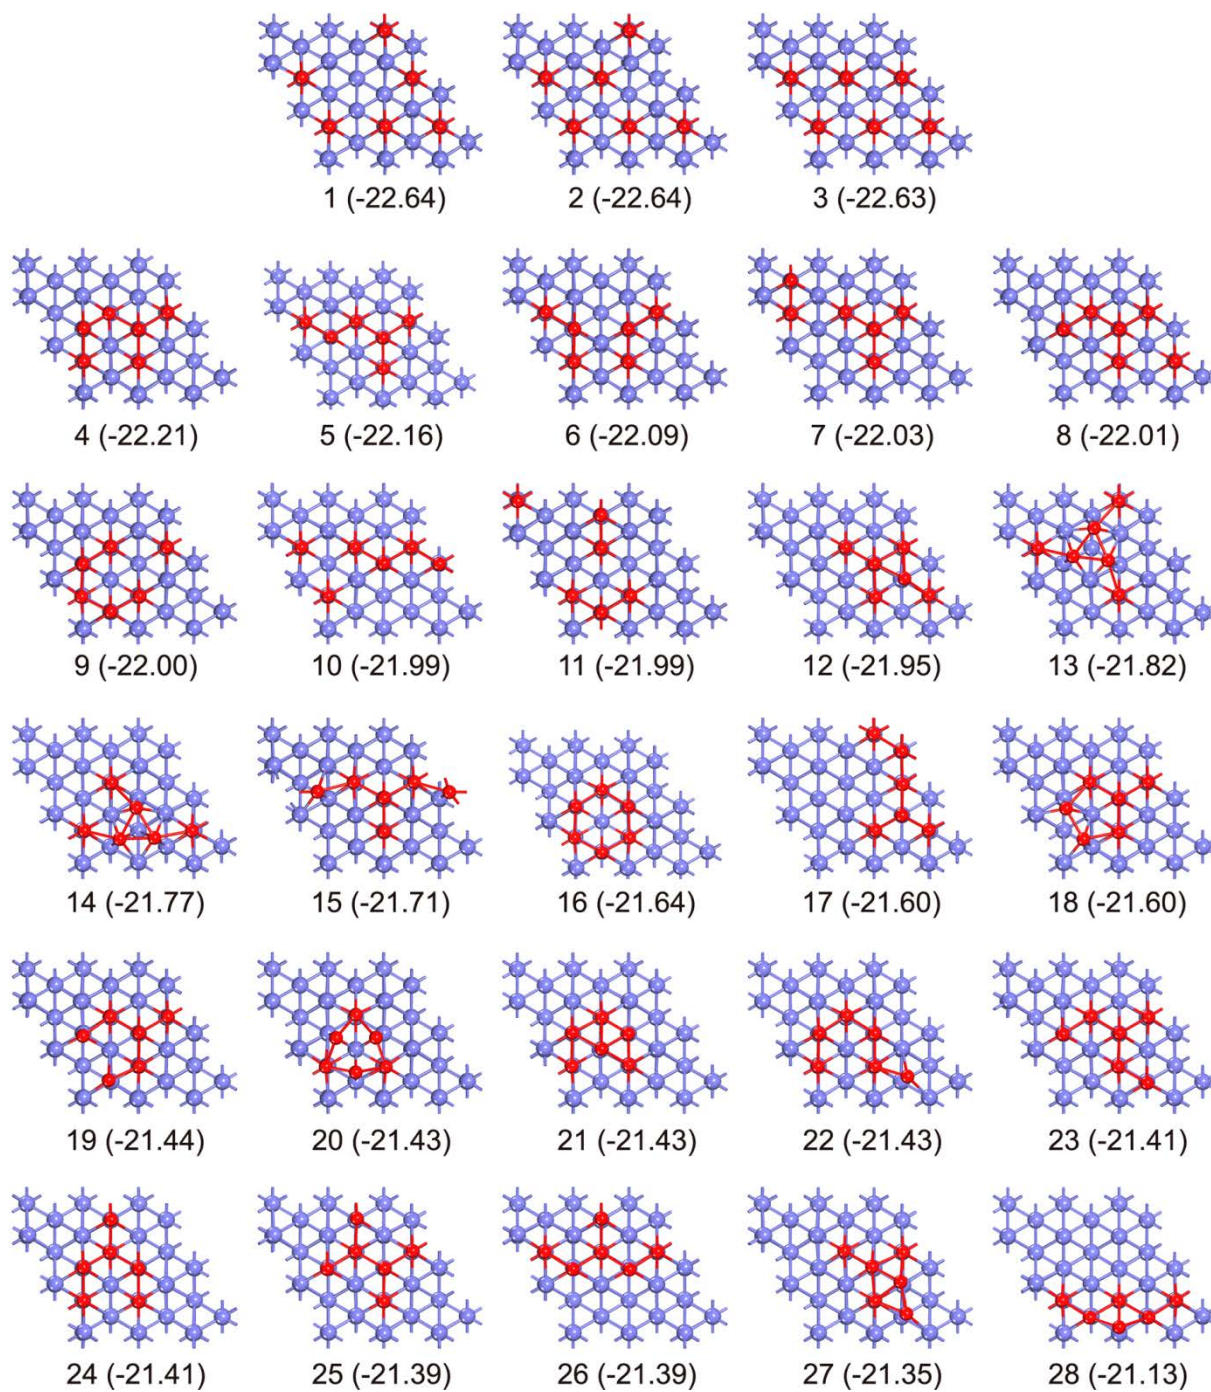



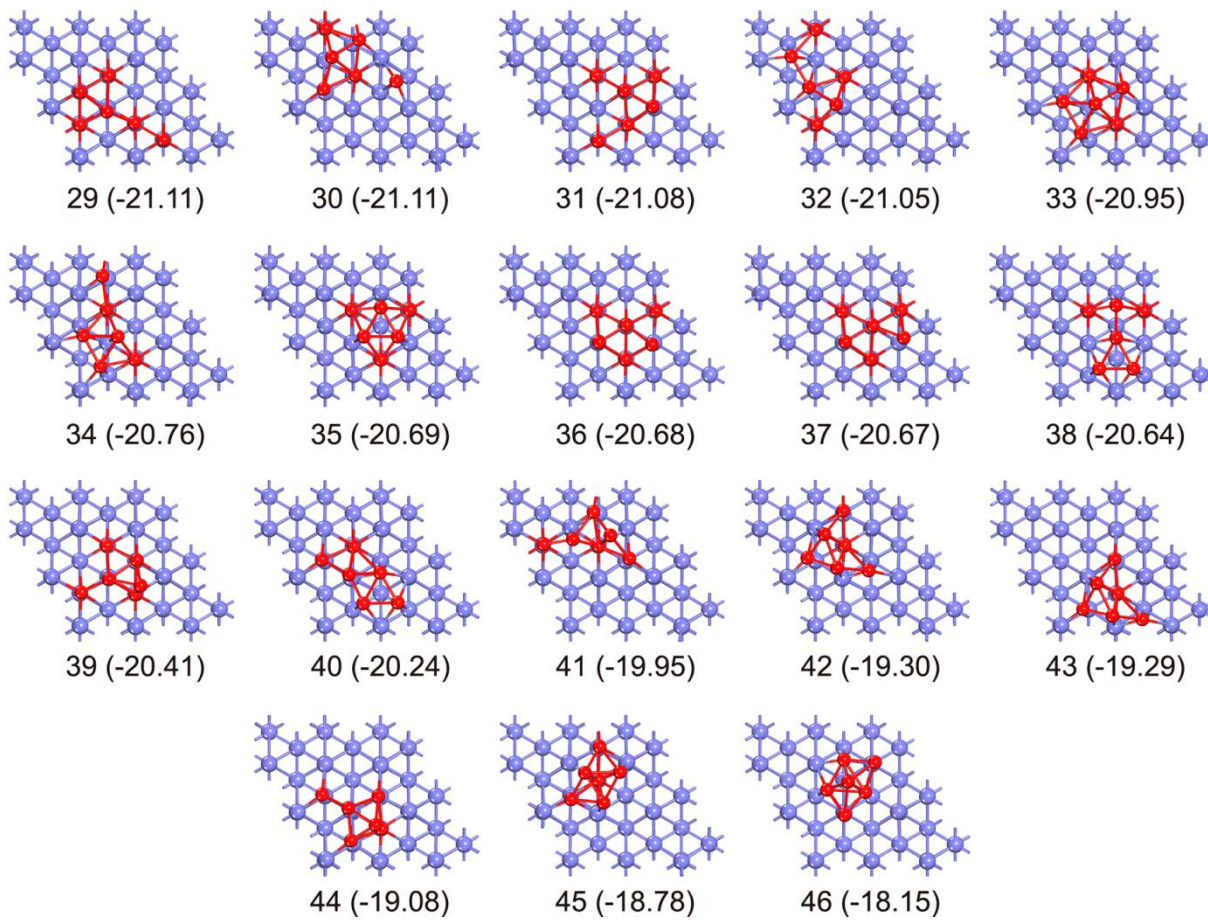

Fig. S8. Various optimized Cu<sub>7</sub> configurations on the p(3×3) Fe(111) surface (adsorption energy in eV)

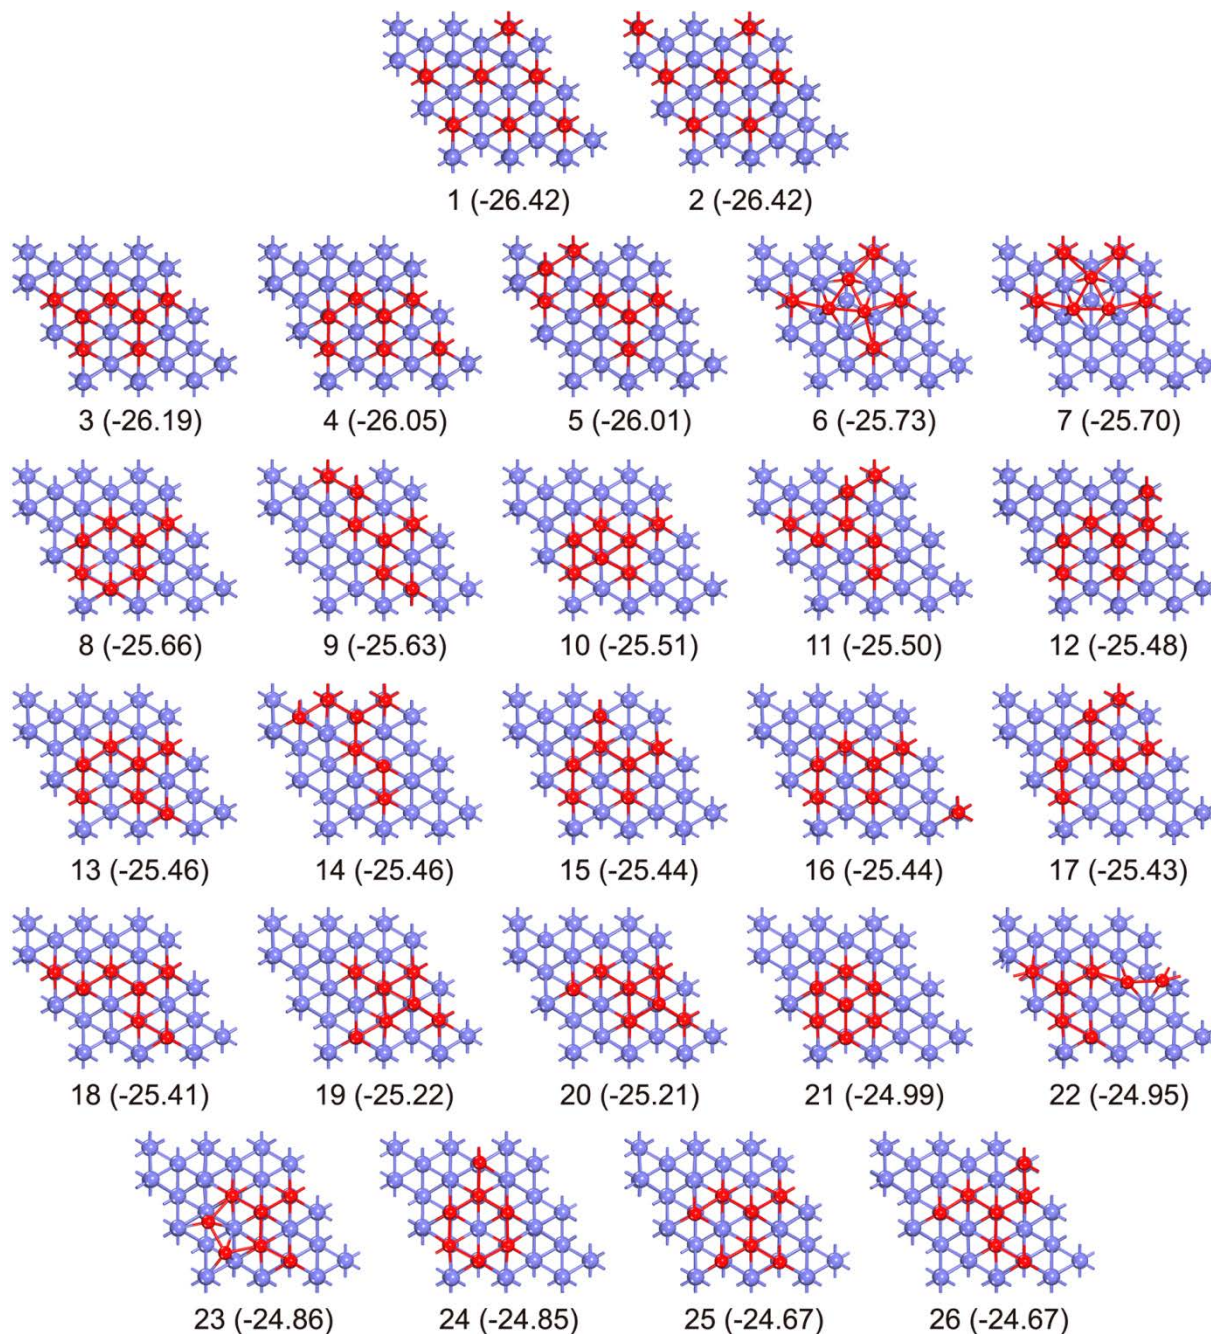



**Fig. S9.** Various optimized  $\text{Cu}_1$  configurations on the  $\text{Fe}_3\text{C}(010)$  surface (adsorption energy in eV)

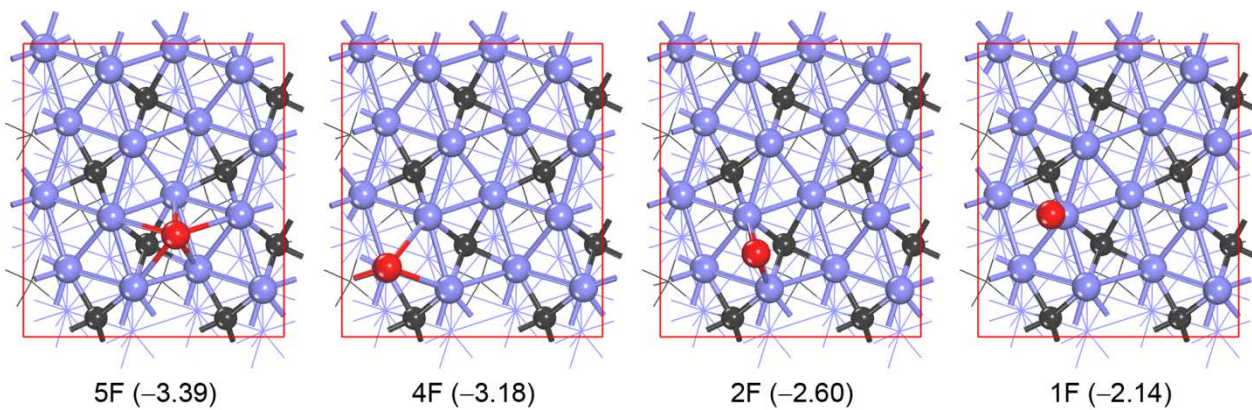

Fig. S10. Various optimized  $\text{Cu}_2$  configurations on the  $\text{Fe}_3\text{C}(010)$  surface (adsorption energy in eV)

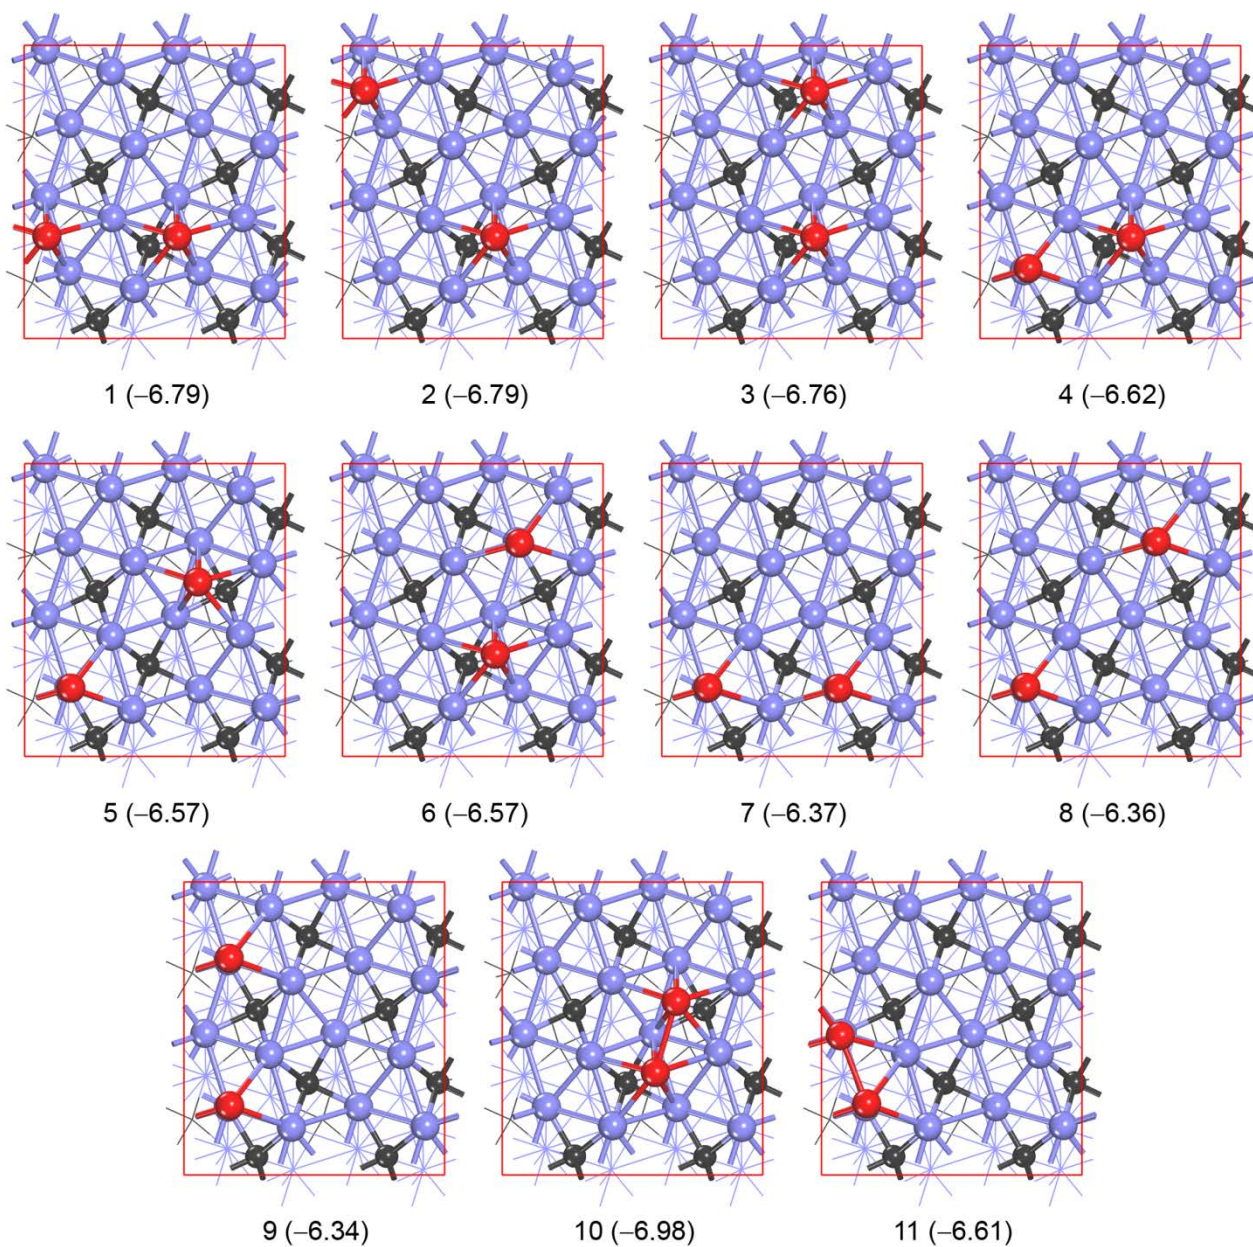



Fig. S11. Various optimized  $\text{Cu}_3$  configurations on the  $\text{Fe}_3\text{C}(010)$  surface (adsorption energy in eV)

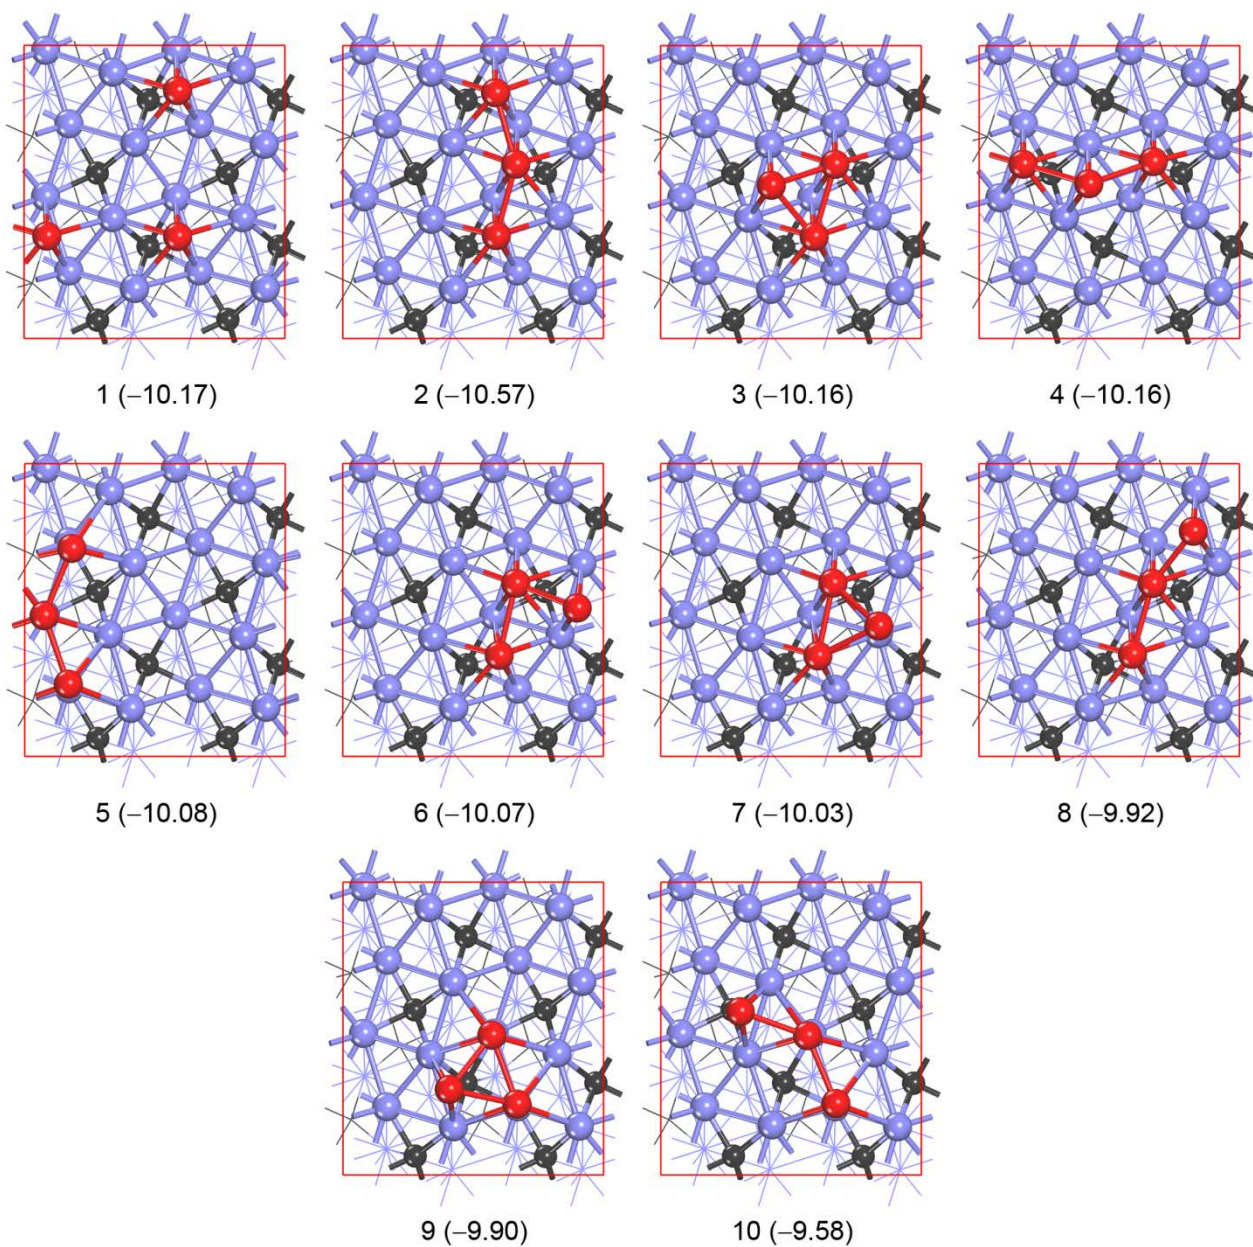



Fig. S12. Various optimized  $\text{Cu}_4$  configurations on the  $\text{Fe}_3\text{C}(010)$  surface (adsorption energy in eV)

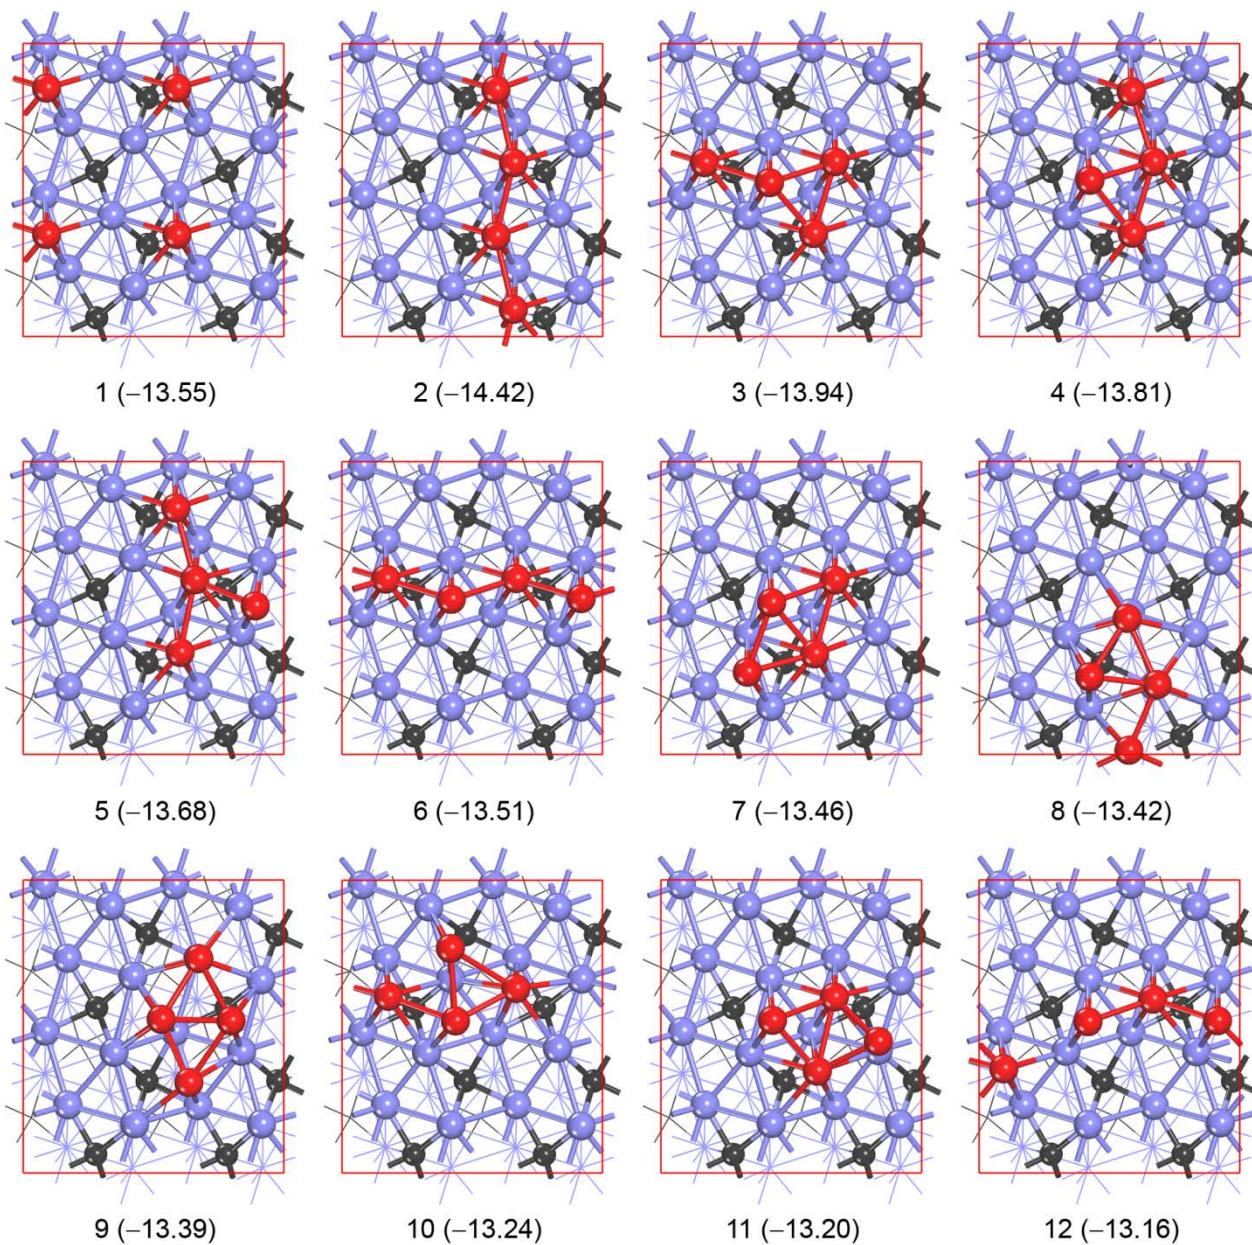



Fig. S13. Various optimized  $\text{Cu}_5$  configurations on the  $\text{Fe}_3\text{C}(010)$  surface (adsorption energy in eV)

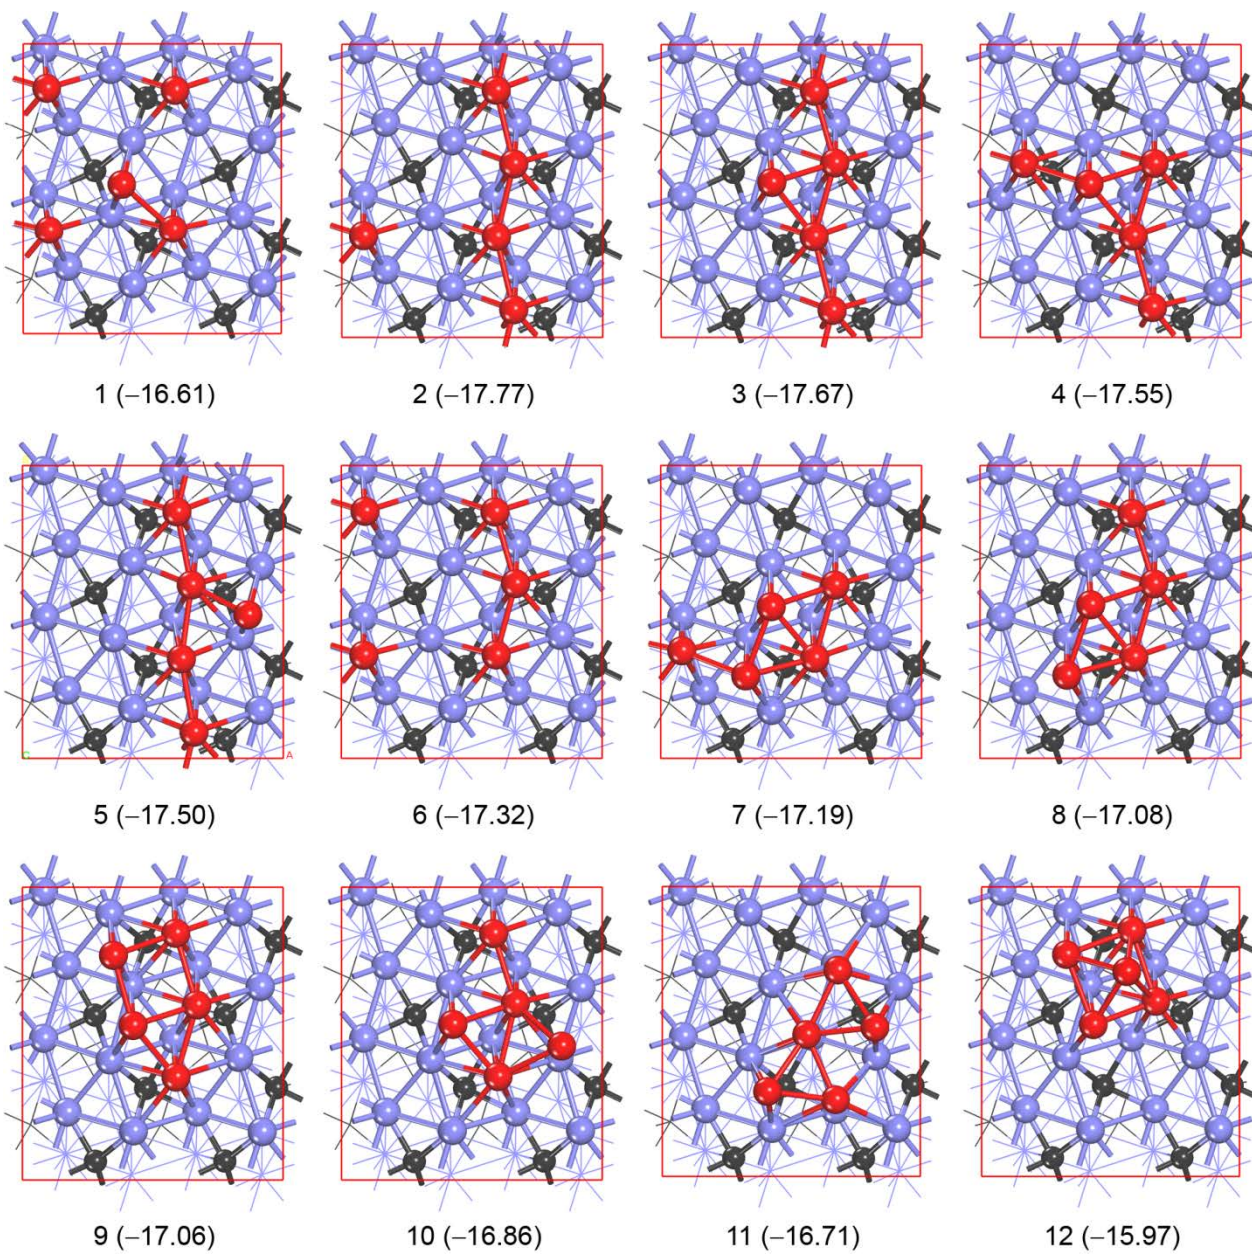



Fig. S14. Various optimized  $\text{Cu}_6$  configurations on the  $\text{Fe}_3\text{C}(010)$  surface (adsorption energy in eV)

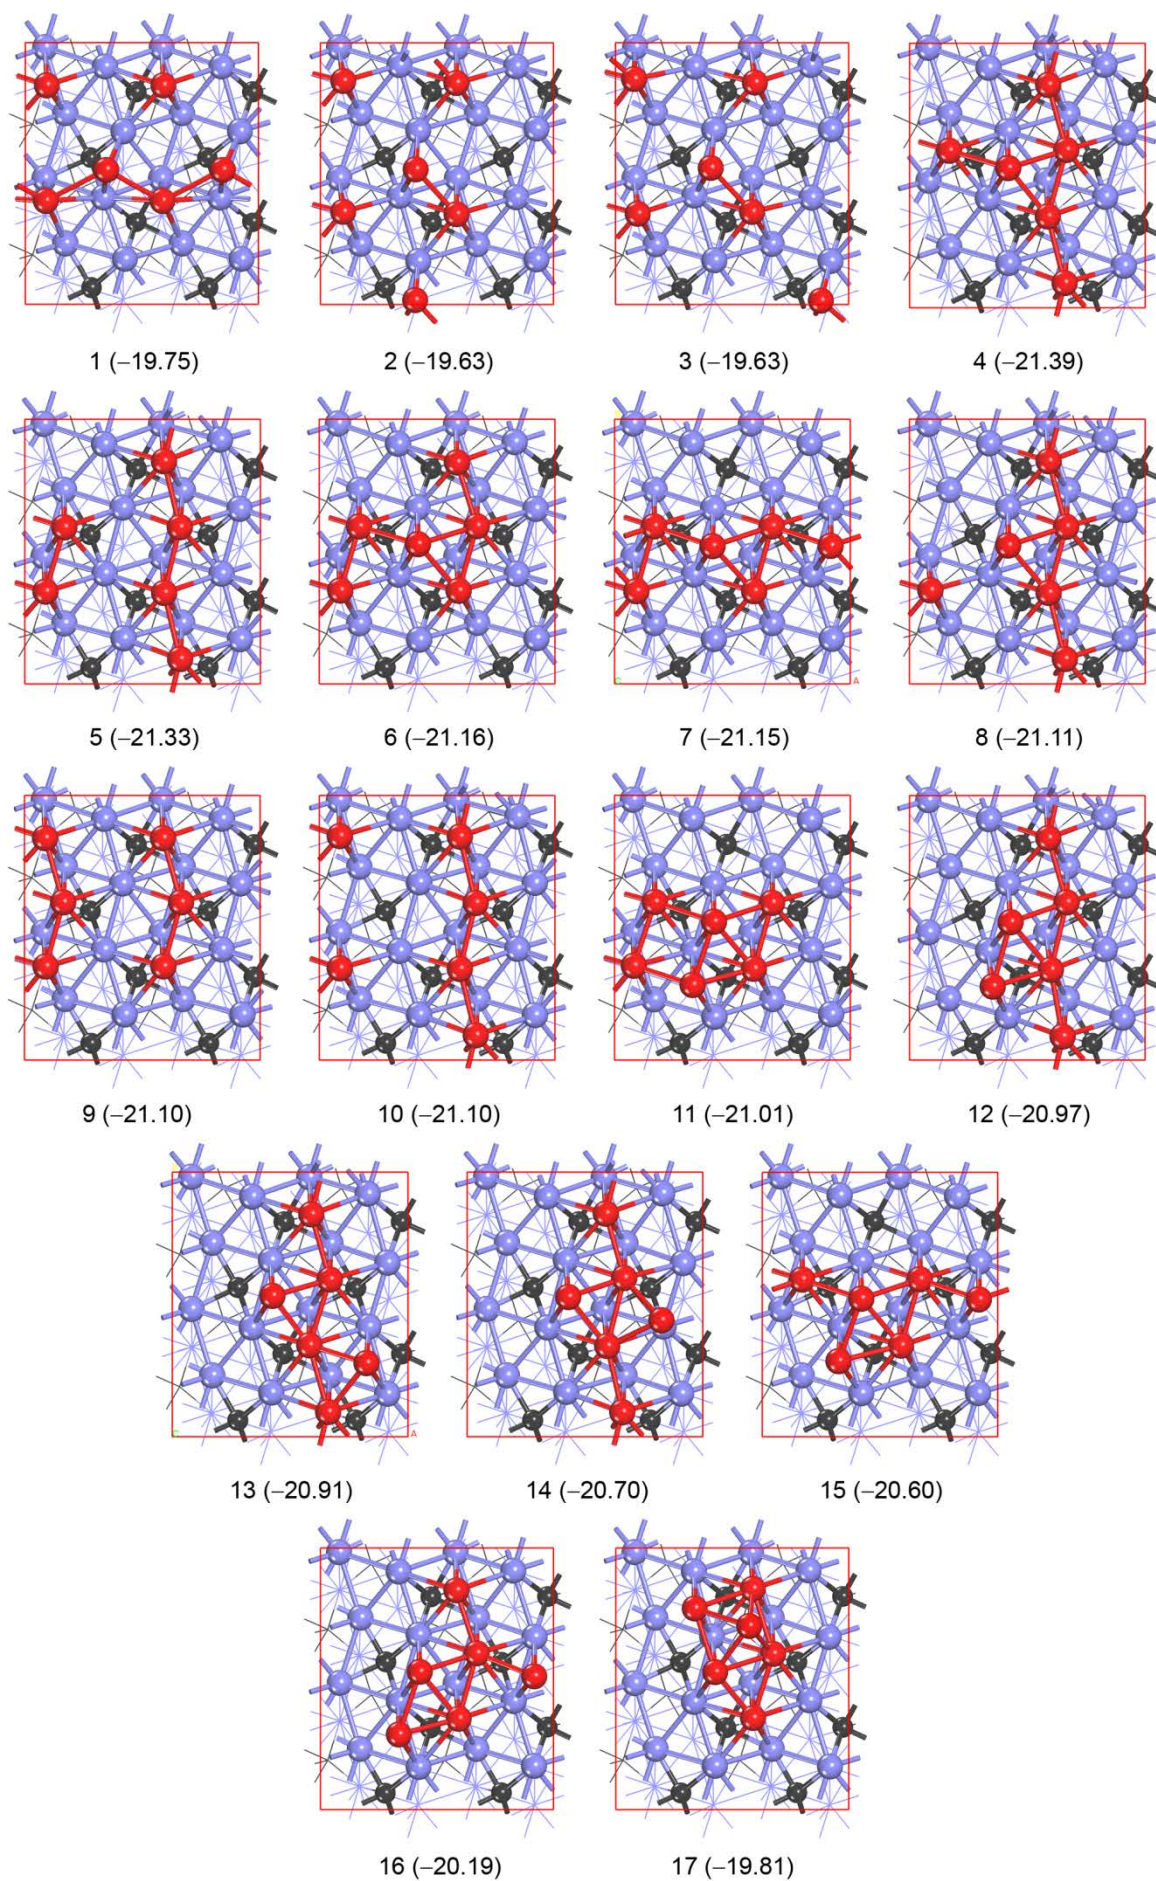

**Fig. S15.** Various optimized Cu<sub>7</sub> configurations on the Fe<sub>3</sub>C(010) surface (adsorption energy in eV)

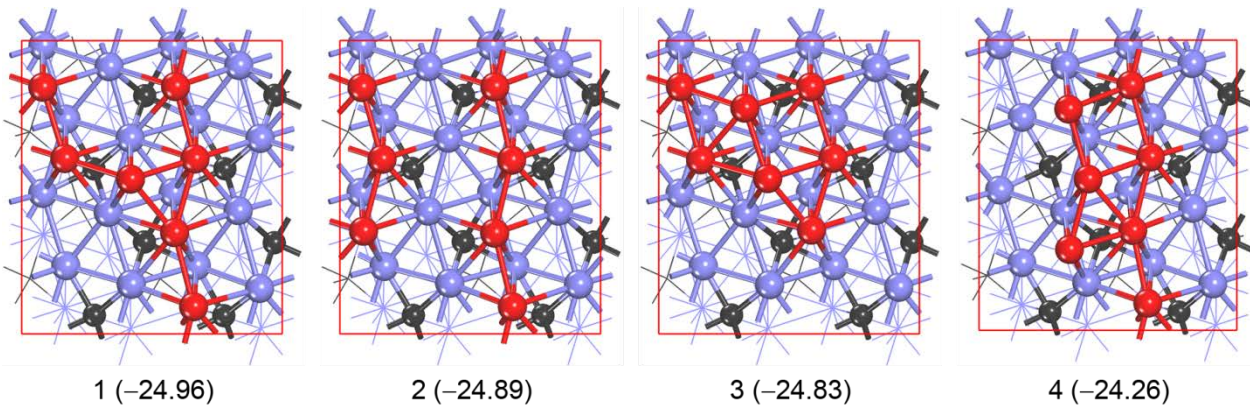



**Fig. S16.** Various optimized  $\text{Cu}_{13}$  configurations on the  $\text{Fe}_3\text{C}(010)$  surface (adsorption energy in eV)

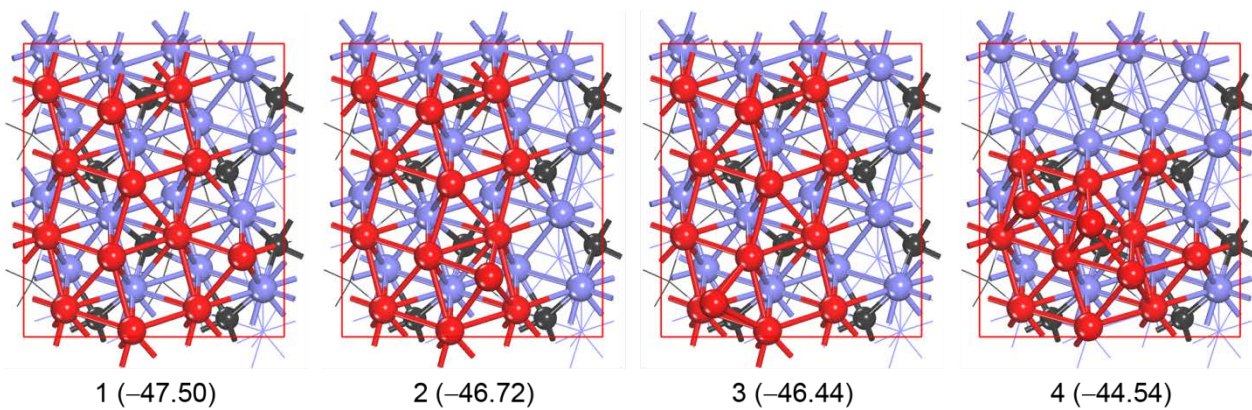



Fig. S17. Various optimized  $\text{Cu}_1$  configurations on the  $\text{Fe}_3\text{C}(100)$  surface (adsorption energy in eV)

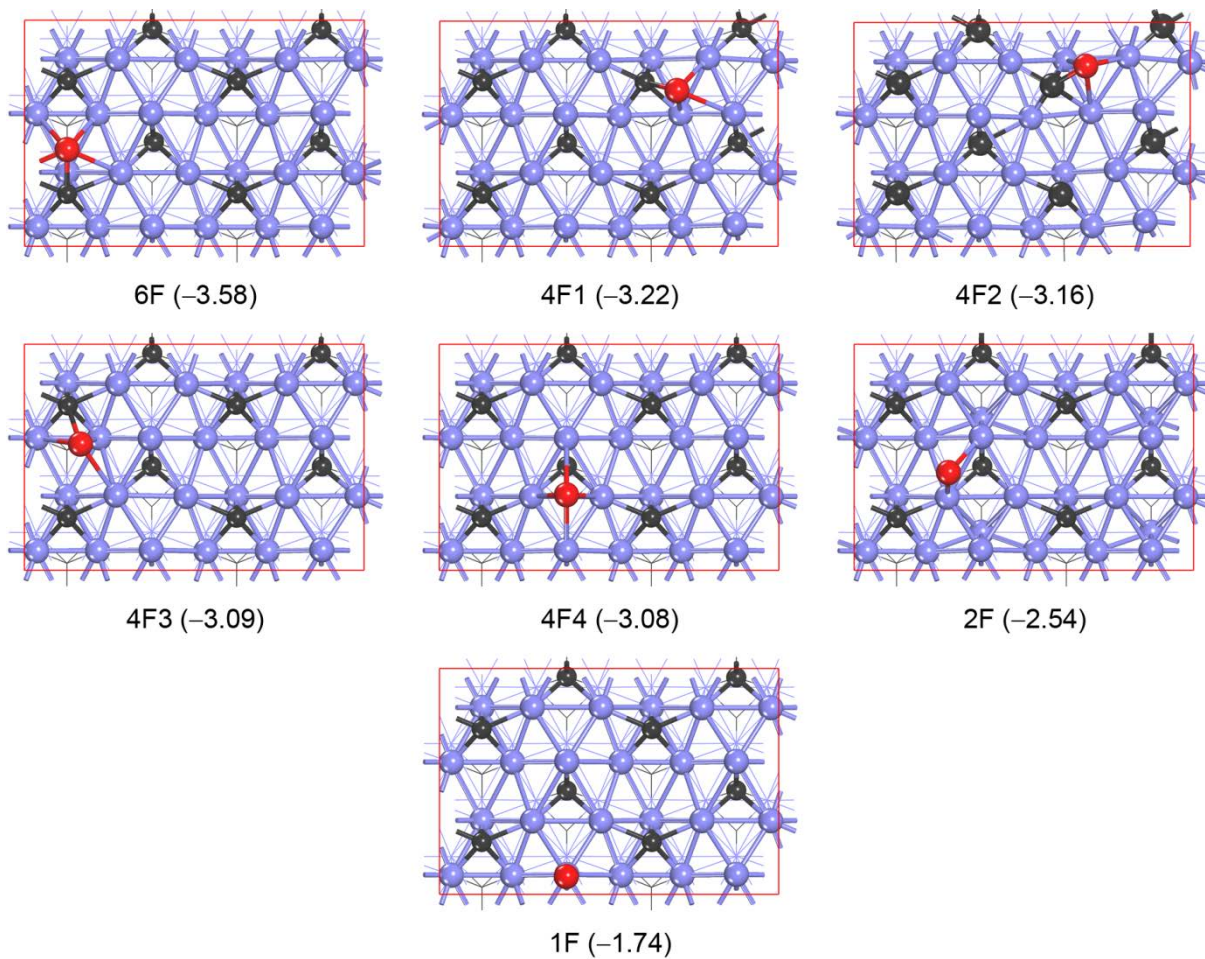

Fig. S18. Various optimized  $\text{Cu}_2$  configurations on the  $\text{Fe}_3\text{C}(100)$  surface (adsorption energy in eV)

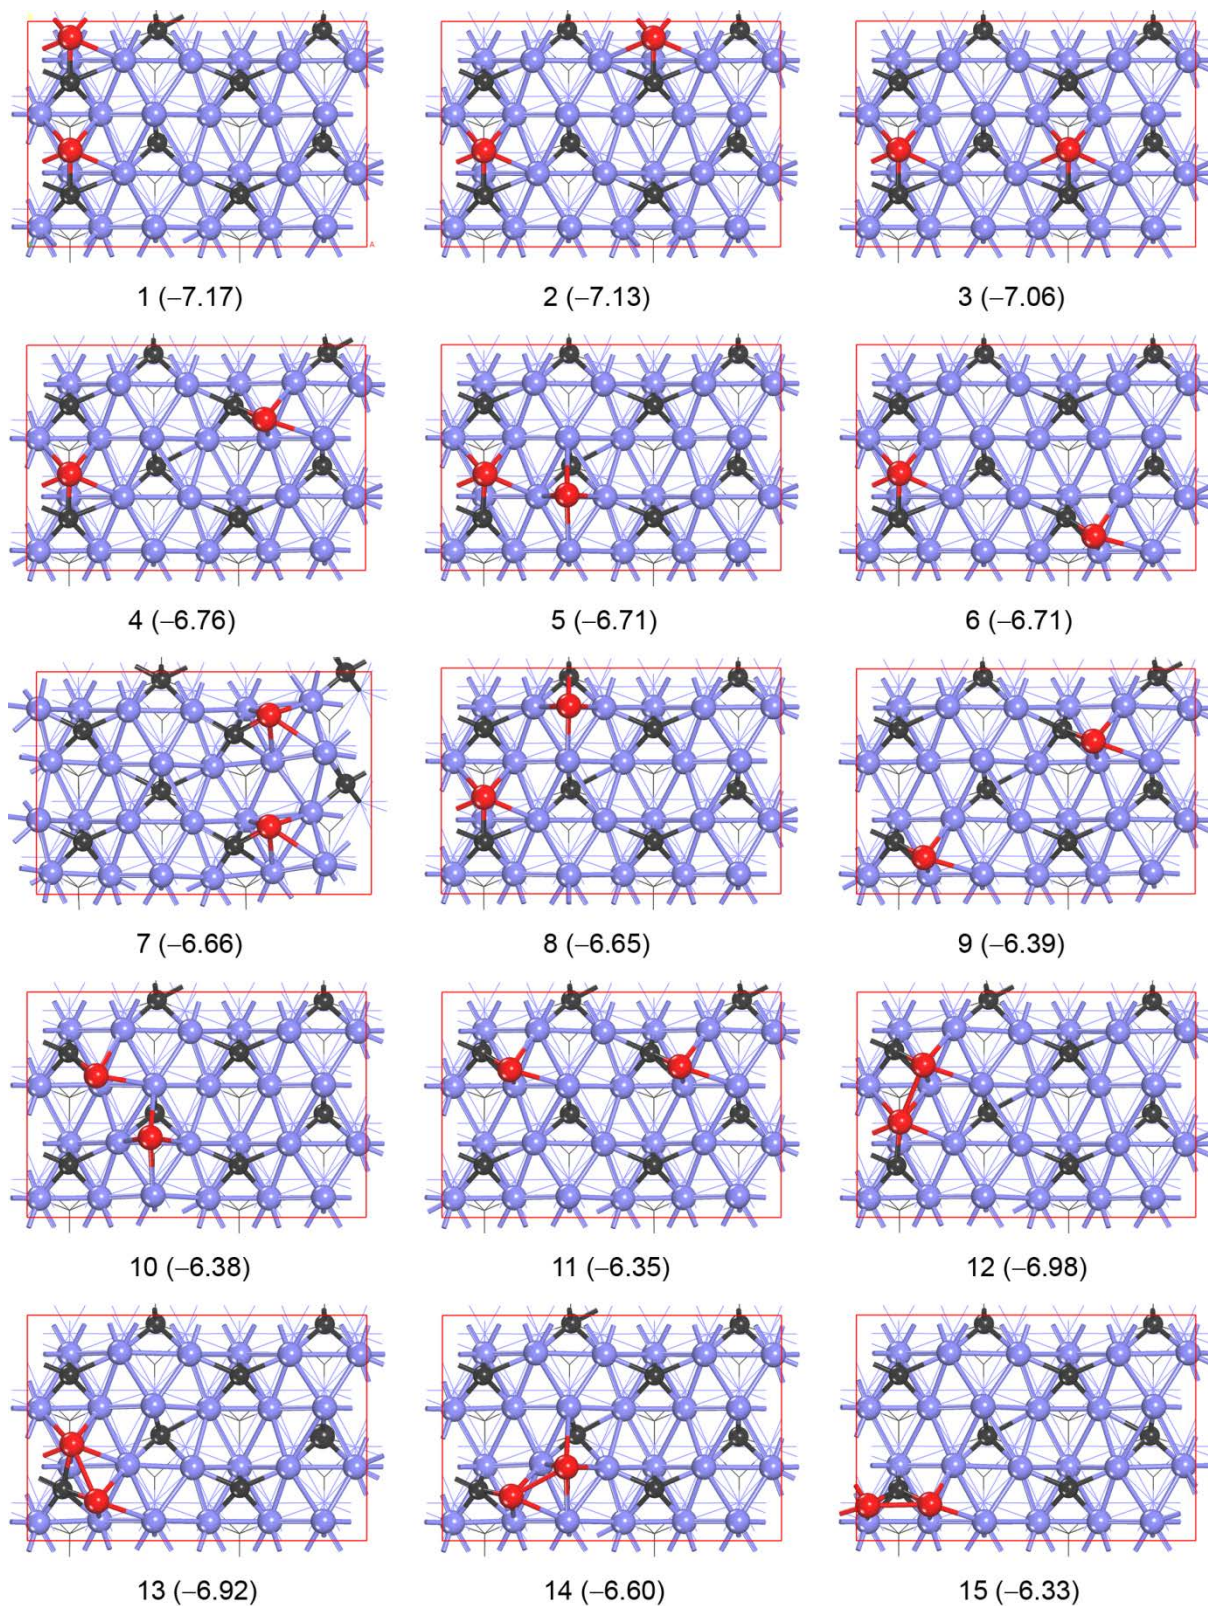



Fig. S19. Various optimized  $\text{Cu}_3$  configurations on the  $\text{Fe}_3\text{C}(100)$  surface (adsorption energy in eV)

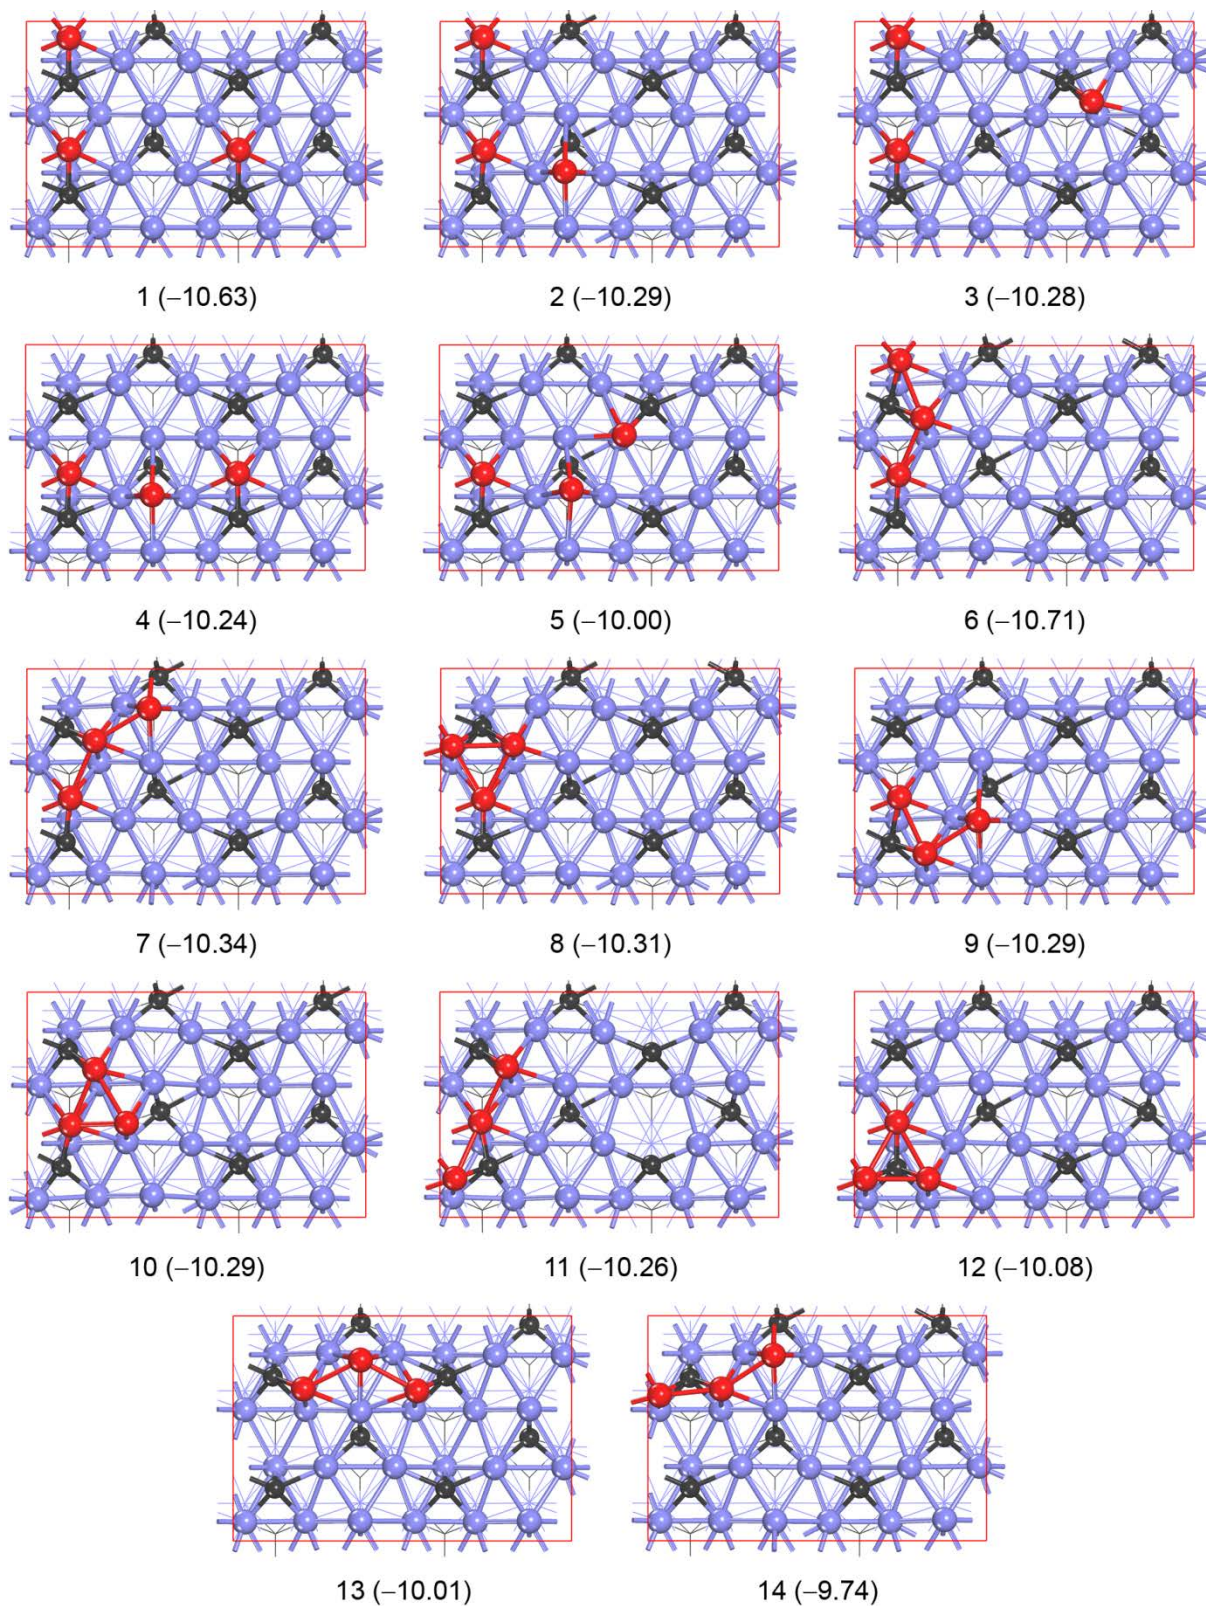



Fig. S20. Various optimized  $\text{Cu}_4$  configurations on the  $\text{Fe}_3\text{C}(100)$  surface (adsorption energy in eV)

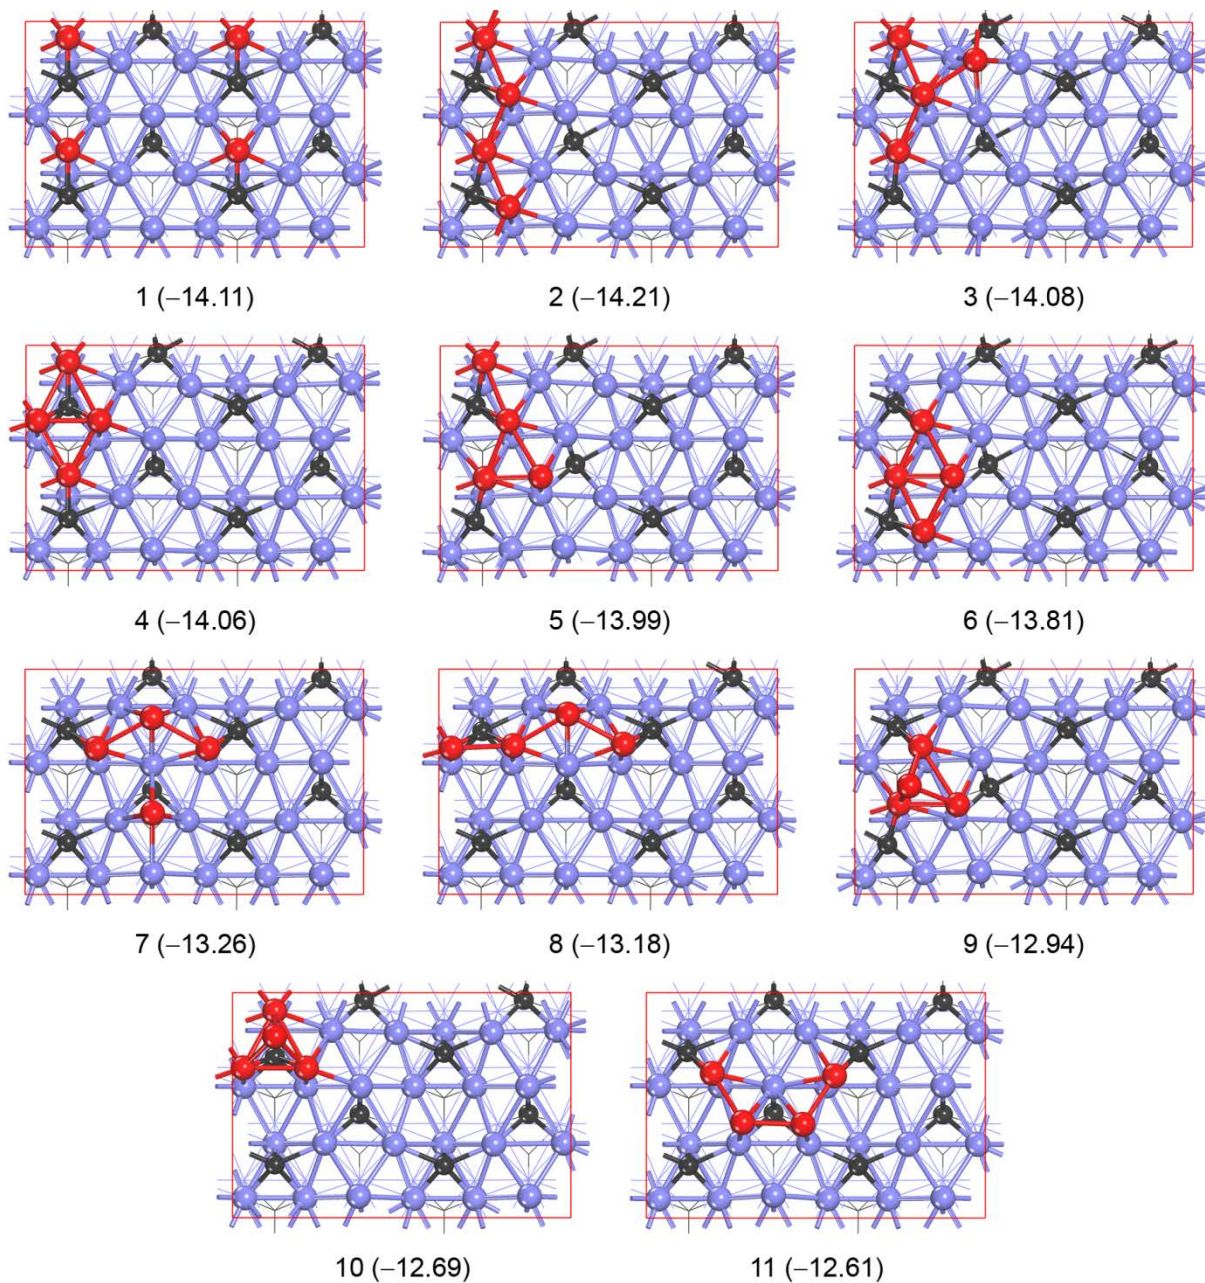



Fig. S21. Various optimized  $\text{Cu}_5$  configurations on the  $\text{Fe}_3\text{C}(100)$  surface (adsorption energy in eV)

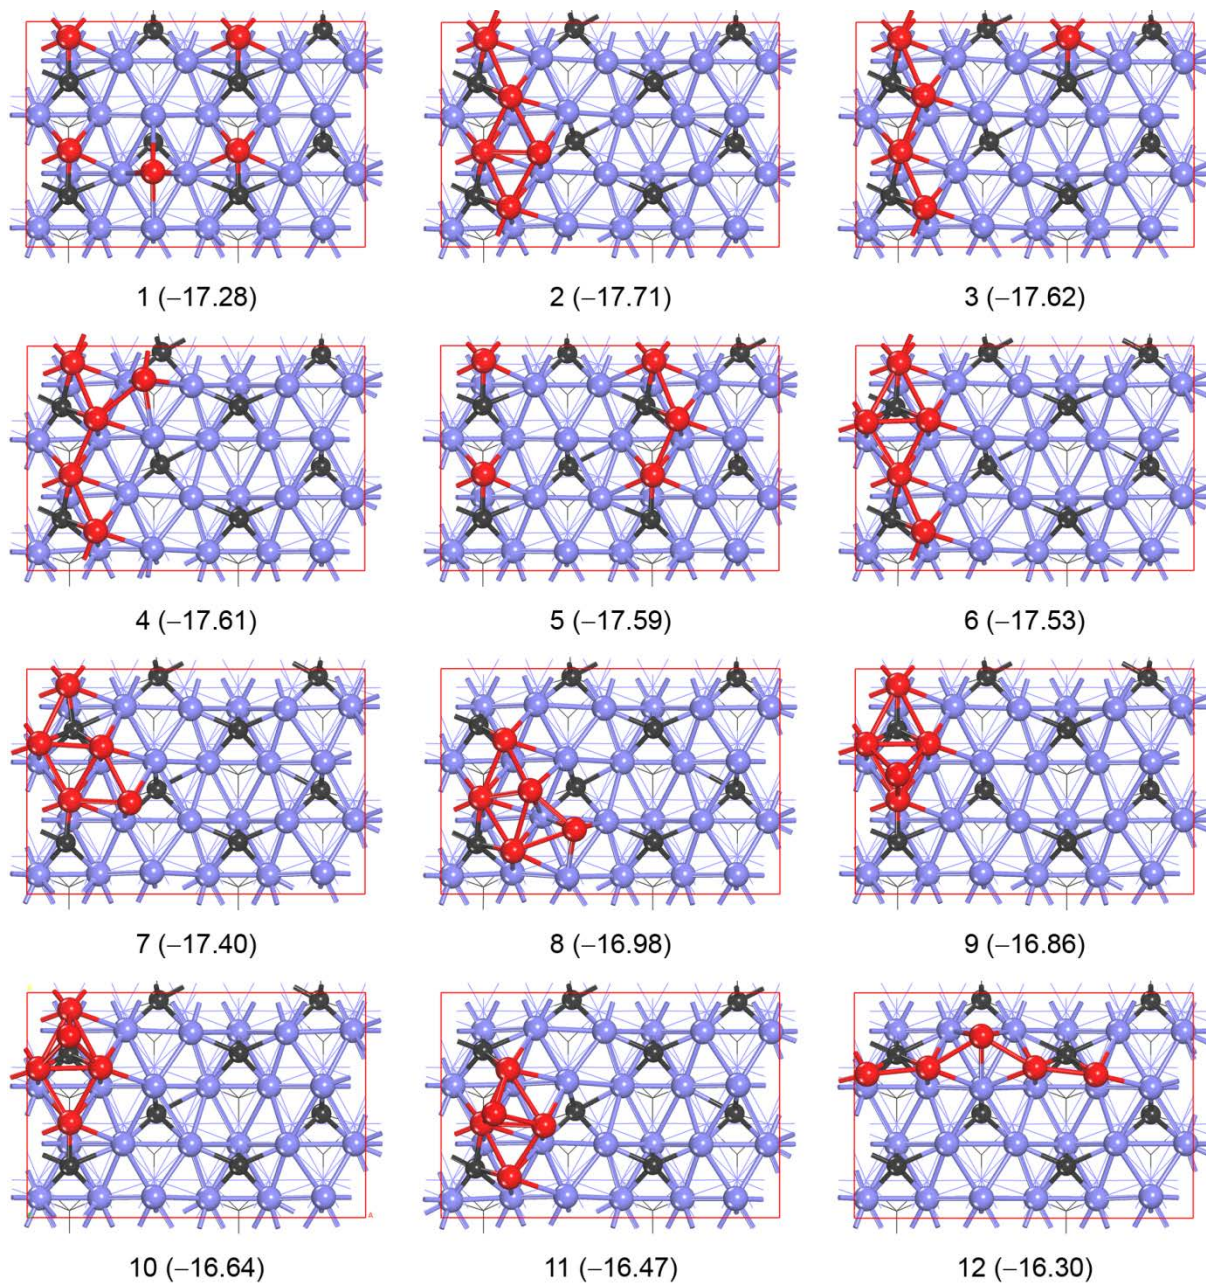



Fig. S22. Various optimized  $\text{Cu}_6$  configurations on the  $\text{Fe}_3\text{C}(100)$  surface (adsorption energy in eV)

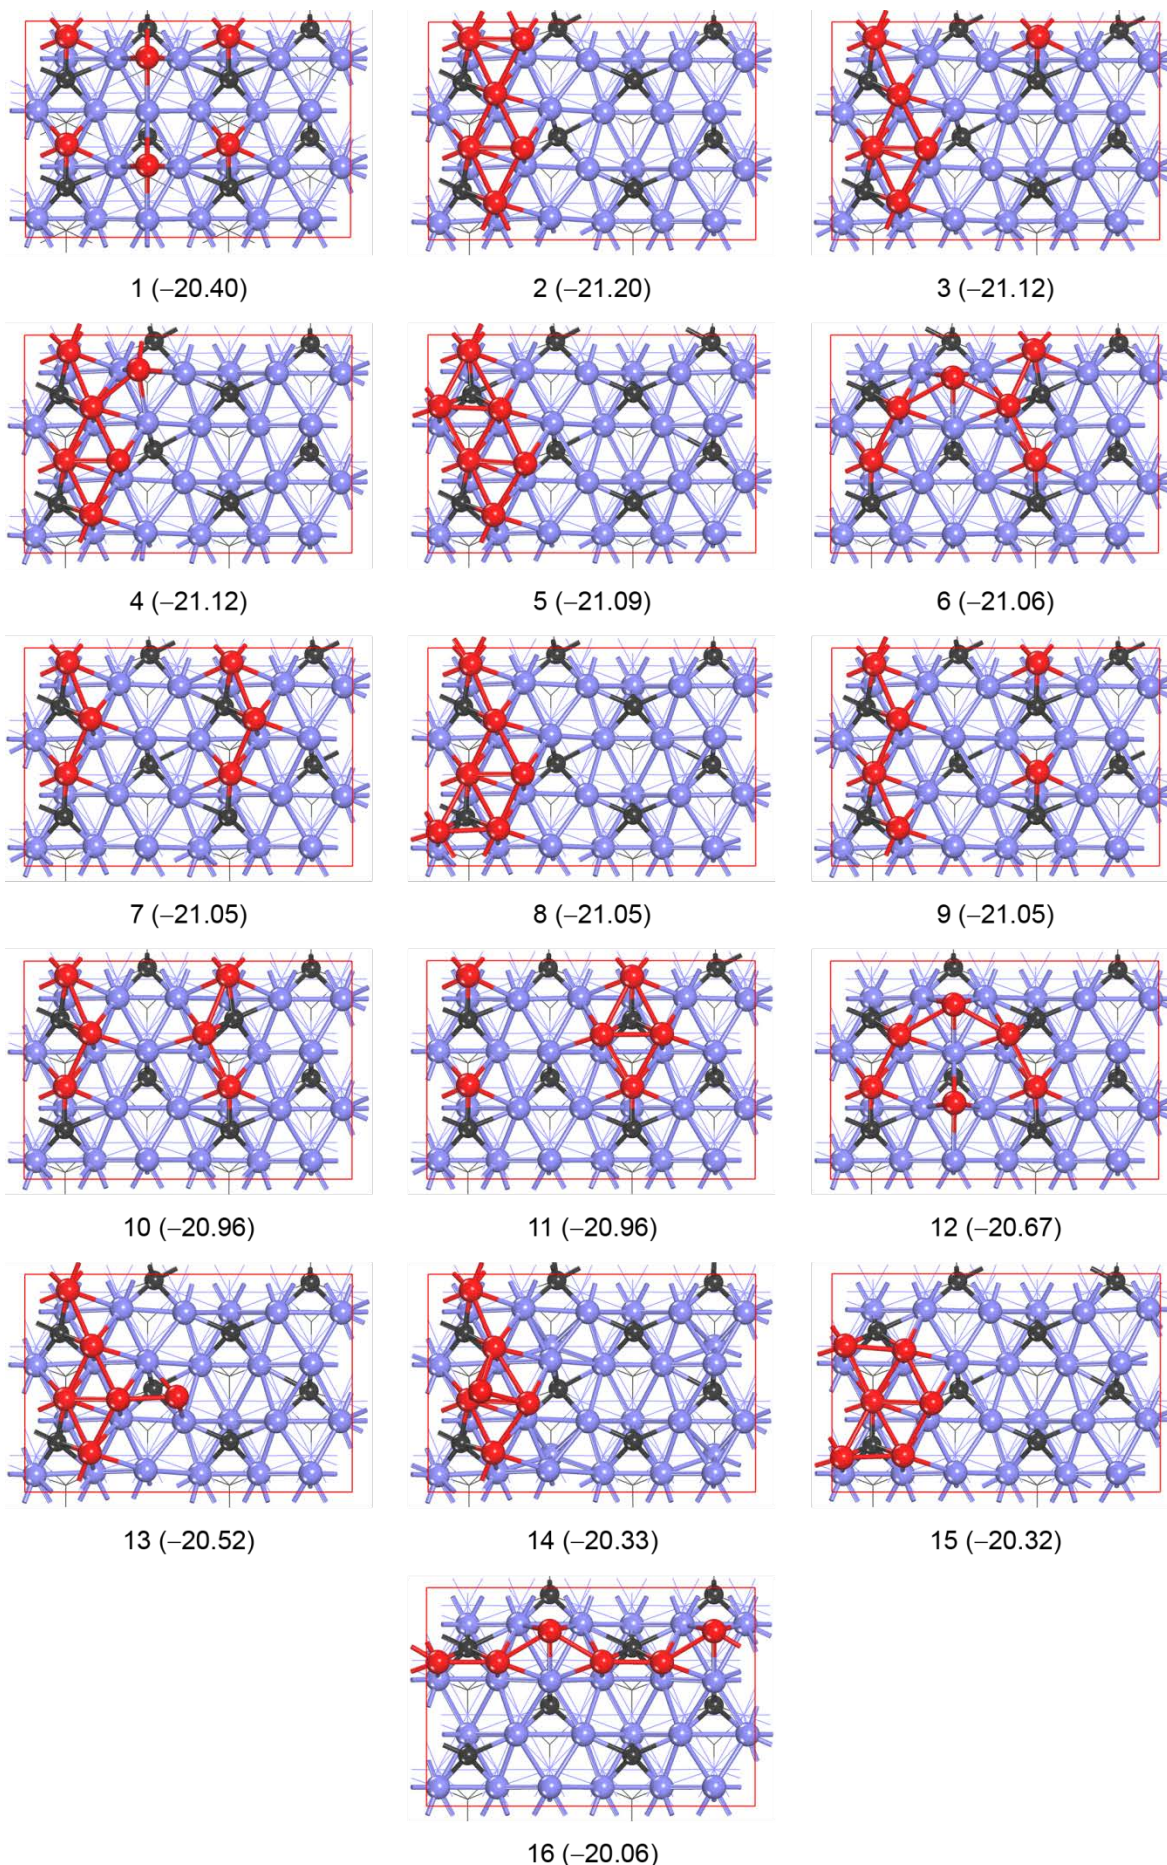

Fig. S23. Various optimized  $\text{Cu}_7$  configurations on the  $\text{Fe}_3\text{C}(100)$  surface (adsorption energy in eV)

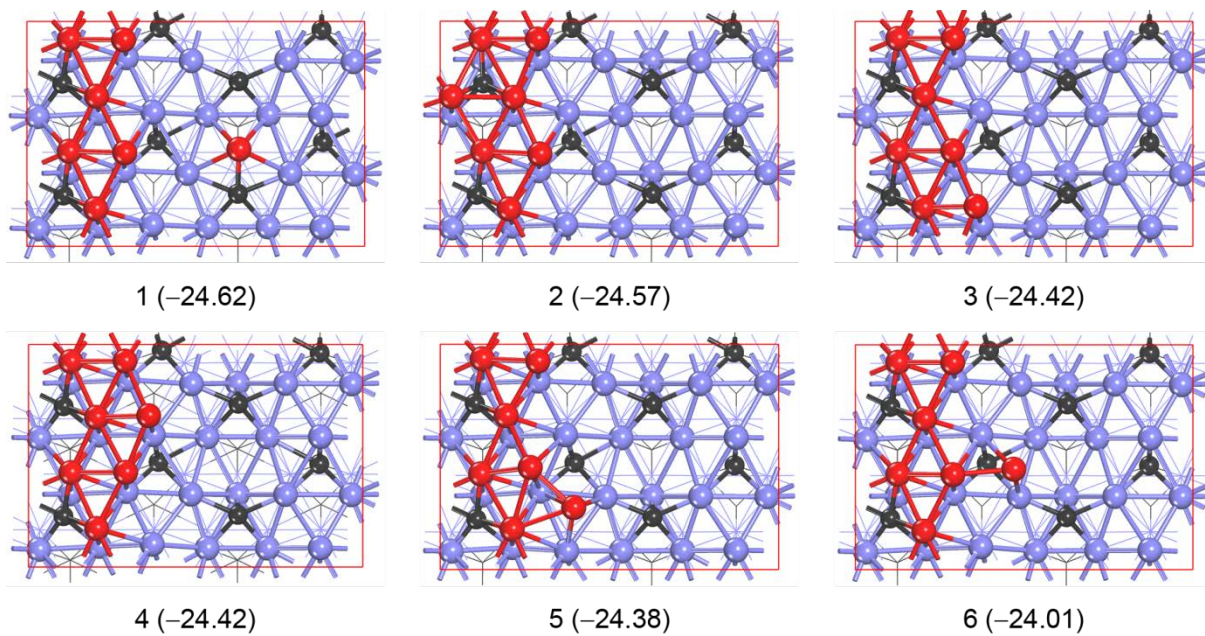



Fig. S24. Various optimized  $\text{Cu}_{13}$  configurations on the  $\text{Fe}_3\text{C}(100)$  surface (adsorption energy in eV)

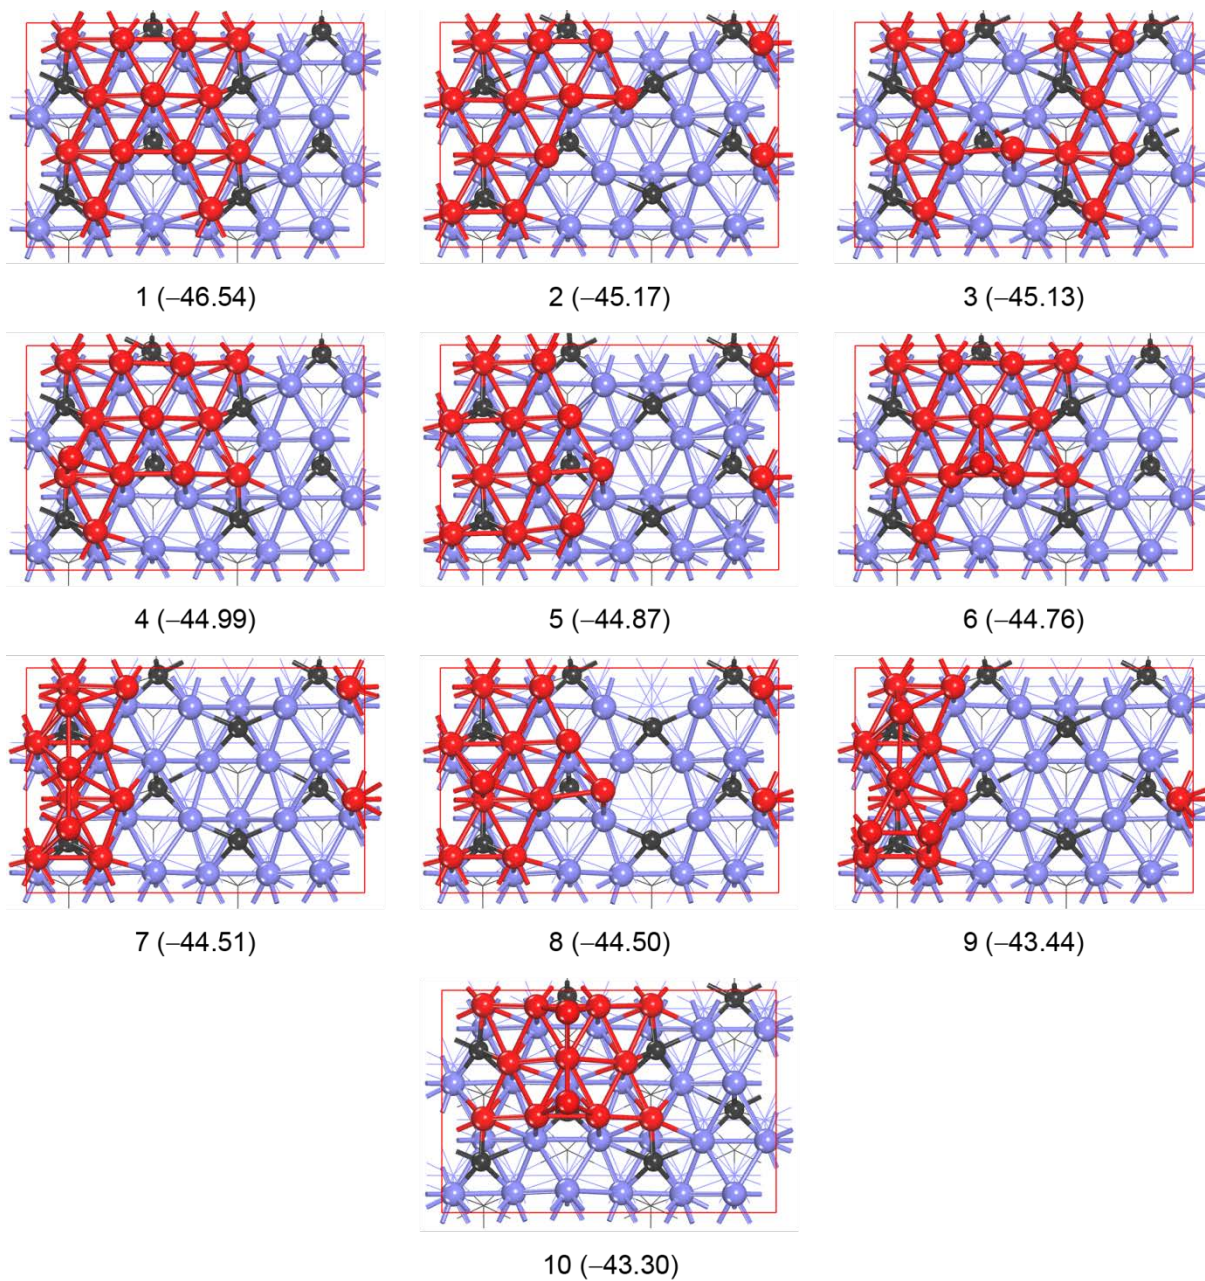



Fig. S25. Surface size effect test of Cu<sub>4</sub> and Cu<sub>5</sub> on the *p*(5×4) Fe(100) surface (adsorption energy in eV)

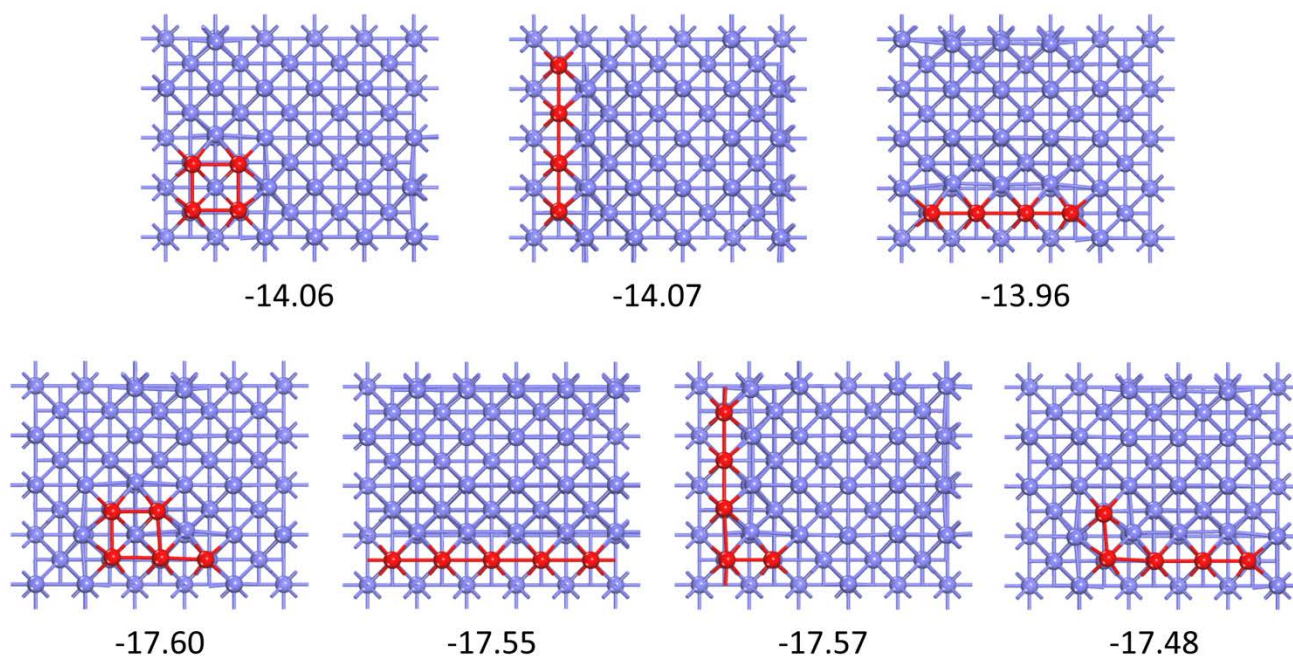

**Fig. S26.** Surface size effect test Cu<sub>5</sub> on the  $p(2\times 3)$  Fe<sub>3</sub>C(010) surface (adsorption energy in eV)

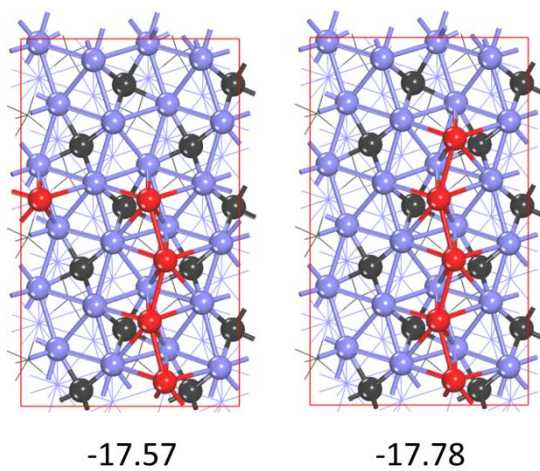

Supplement: c4cp04012k1.pdf [file c4cp04012k1.pdf]
